# Supplementary material for: Isoprenoids from the Soft Coral Sarcophyton glaucum
Source: PubMed Central journal article supplement (PMC5532644; doi:10.3390/md15070202), 2017-06-27
Supplement: marinedrugs-15-00202-s001.pdf [file marinedrugs-15-00202-s001.pdf]

# Isoprenoids from the Soft Coral *Sarcophyton glaucum*

Chih-Hua Chao<sup>1,2,†</sup>, Wen-Liang Li<sup>3,†</sup>, Chiung-Yao Huang<sup>3</sup>, Atallah F. Ahmed<sup>4</sup>, Chang-Feng Dai<sup>5</sup>, Yang-Chang Wu<sup>6,7,8</sup>, Mei-Chin Lu<sup>9,10</sup>, Chih-Chuang Liaw<sup>3</sup> and Jyh-Horng Sheu<sup>3,6,11,12,\*</sup>

<sup>1</sup> School of Pharmacy, China Medical University, Taichung 404, Taiwan; chaochihhua@hotmail.com

<sup>2</sup> Chinese Medicine Research and Development Center, China Medical University Hospital, Taichung 404, Taiwan

<sup>3</sup> Department of Marine Biotechnology and Resources, National Sun Yat-sen University, Kaohsiung 804, Taiwan; adj456@hotmail.com (W.-L.L.);  
huangcy@mail.nsysu.edu.tw (C.-Y.H.); ccliaw@mail.nsysu.edu.tw (C.-C.L.)

<sup>4</sup> Department of Pharmacognosy, College of Pharmacy, King Saud University, Riyadh 11451, Saudi Arabia; afahmed@ksu.edu.sa

<sup>5</sup> Institute of Oceanography, National Taiwan University, Taipei 112, Taiwan; corallab@ntu.edu.tw

<sup>6</sup> Graduate Institute of Natural Products, Kaohsiung Medical University, Kaohsiung 807, Taiwan; yachwu@mail.cmu.edu.tw

<sup>7</sup> Research Center for Natural Products & Drug Development, Kaohsiung Medical University, Kaohsiung 807, Taiwan

<sup>8</sup> Department of Medical Research, Kaohsiung Medical University Hospital, Kaohsiung 807, Taiwan

<sup>9</sup> Graduate Institute of Marine Biotechnology, National Dong Hwa University, Pingtung 944, Taiwan; jinx6609@nmma.gov.tw

<sup>10</sup> National Museum of Marine Biology & Aquarium, Pingtung 944, Taiwan; pjsung@nmma.gov.tw

<sup>11</sup> Department of Medical Research, China Medical University Hospital, China Medical University, Taichung 404, Taiwan

<sup>12</sup> Frontier Center for Ocean Science and Technology, National Sun Yat-sen University, Kaohsiung 804, Taiwan

\*Correspondence: sheu@mail.nsysu.edu.tw; Tel: +886-7-5252000 (ext. 5030); Fax: +886-7-5255020

† These authors contributed equally to this work

**For compound 1:**

**Figure S1-1.**  $^1\text{H}$  NMR spectrum (400 MHz) of compound **1** in  $\text{CDCl}_3$ .

**Figure S1-2.**  $^{13}\text{C}$  NMR spectrum (100 MHz) of compound **1** in  $\text{CDCl}_3$ .

**Figure S1-3.** NOESY spectrum of compound **1** in  $\text{CDCl}_3$ .

**For compound 2:**

**Figure S2-1.**  $^1\text{H}$  NMR spectrum (400 MHz) of compound **2** in  $\text{CDCl}_3$ .

**Figure S2-2.**  $^{13}\text{C}$  NMR spectrum (100 MHz) of compound **2** in  $\text{CDCl}_3$ .

**For compound 3:**

**Figure S3-1.**  $^1\text{H}$  NMR spectrum (400 MHz) of compound **3** in  $\text{CDCl}_3$ .

**Figure S3-2.**  $^{13}\text{C}$  NMR spectrum (100 MHz) of compound **3** in  $\text{CDCl}_3$ .

**For compound 4:**

**Figure S4-1.**  $^1\text{H}$  NMR spectrum (400 MHz) of compound **4** in DMSO.

**Figure S4-2.**  $^{13}\text{C}$  NMR spectrum (100 MHz) of compound **4** in DMSO.

**For compound 5:**

**Figure S5-1.**  $^1\text{H}$  NMR spectrum (400 MHz) of compound **5** in  $\text{CD}_3\text{OD}$ .

**Figure S5-2.**  $^{13}\text{C}$  NMR spectrum (100 MHz) of compound **5** in  $\text{CD}_3\text{OD}$ .

**For compound 7:**

**Figure S6-1.**  $^1\text{H}$  NMR spectrum (400 MHz) of compound **7** in  $\text{CDCl}_3$ .

**Figure S6-2.**  $^{13}\text{C}$  NMR spectrum (100 MHz) of compound **7** in  $\text{CDCl}_3$ .

**Figure S6-3.** Partial NOESY spectrum of compound **7** in  $\text{CDCl}_3$ .

F1-35-3-1

Sample Name:  
F1-35-3-1  
Data Collected on:  
Varian-NMR-vnmrs400  
Archive directory:  
/home/sheu/vnmrsys/data  
Sample directory:  
F1-35-3-1\_20141027\_02  
FidFile: PROTON\_01

Pulse Sequence: PROTON (s2pu1)  
Solvent: cdc13  
Data collected on: Oct 27 2014

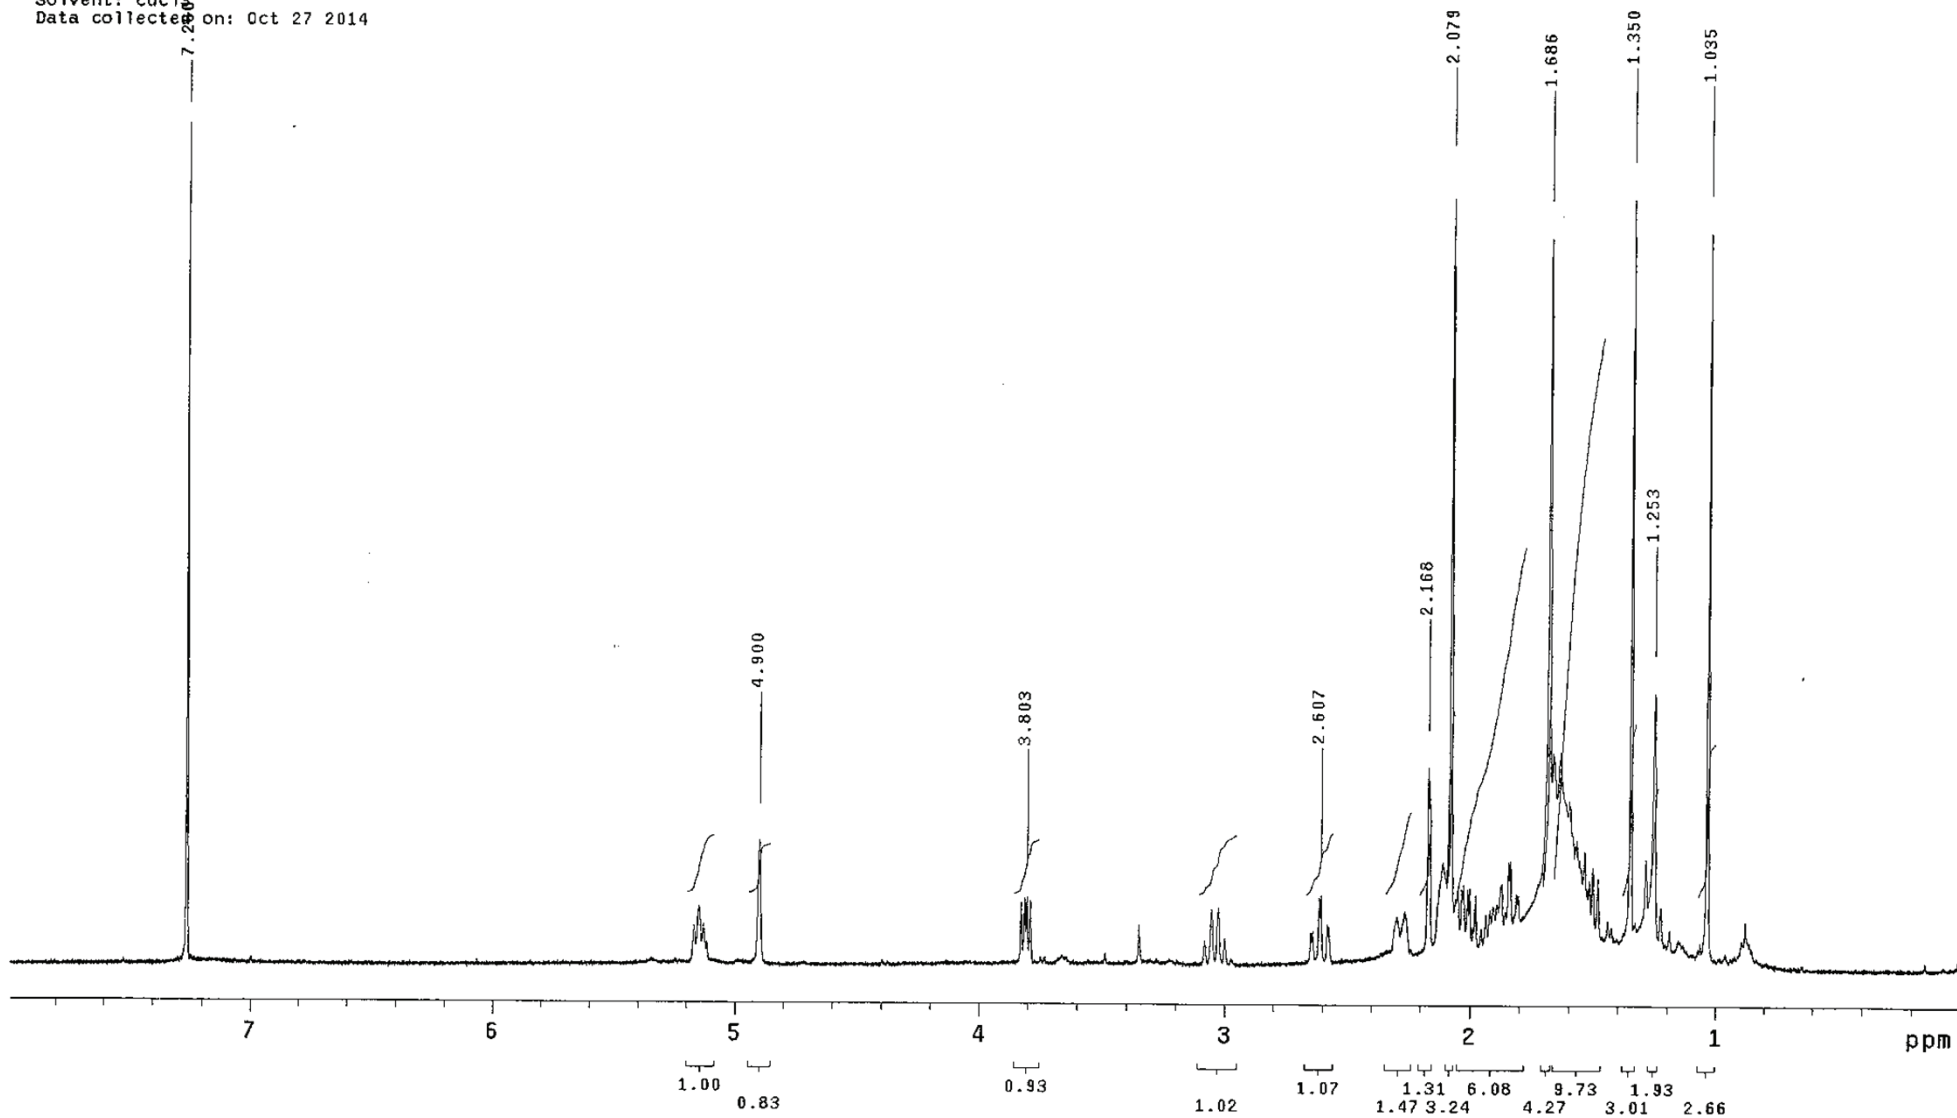

Figure S1-1. <sup>1</sup>H NMR spectrum (400 MHz) of compound 1 in CDCl<sub>3</sub>.

F1-35-3-1

Sample Name:  
F1-35-3-1  
Data Collected on:  
Varian-NMR-vnmrs400  
Archive directory:  
/home/sheu/vnmrsys/data  
Sample directory:  
F1-35-3-1\_20141027\_02  
FidFile: CARBON\_01

Pulse Sequence: CARBON [s2pu1]  
Solvent: cdc13  
Data collected on: Oct 27 2014

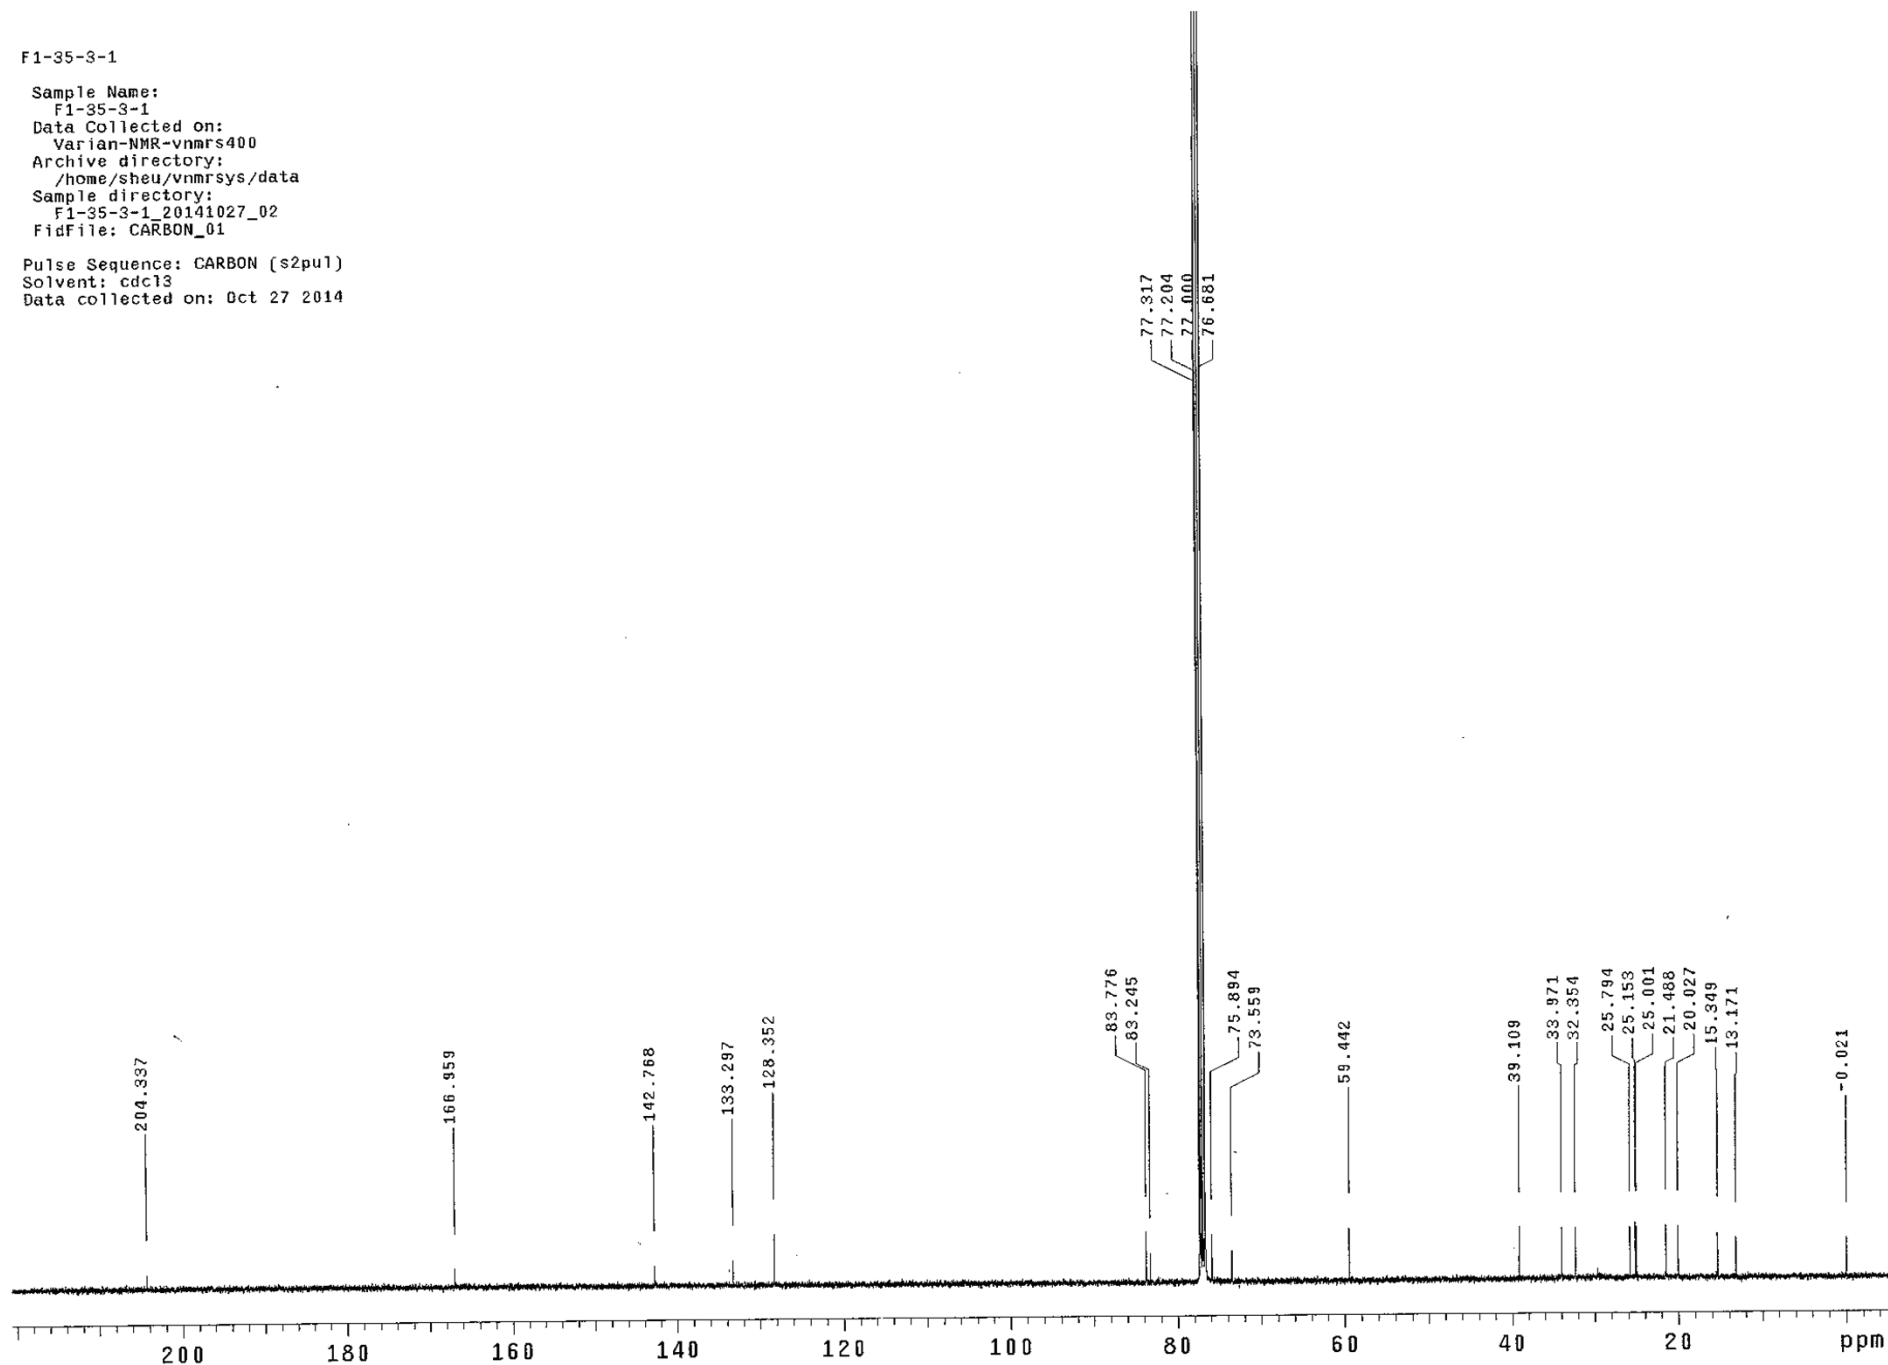

Figure S1-2. <sup>13</sup>C NMR spectrum (100 MHz) of compound 1 in CDCl<sub>3</sub>.

F1-35-3-1

Sample Name:  
F1-35-3-1  
Data Collected on:  
Varian-NMR-vnmrs400  
Archive directory:  
/home/sheu/vnmrsys/data  
Sample directory:  
F1-35-3-1\_20141111\_01  
FidFile: NOESY\_01

Pulse Sequence: NOESY  
Solvent: cdcl3  
Data collected on: Nov 11 2014

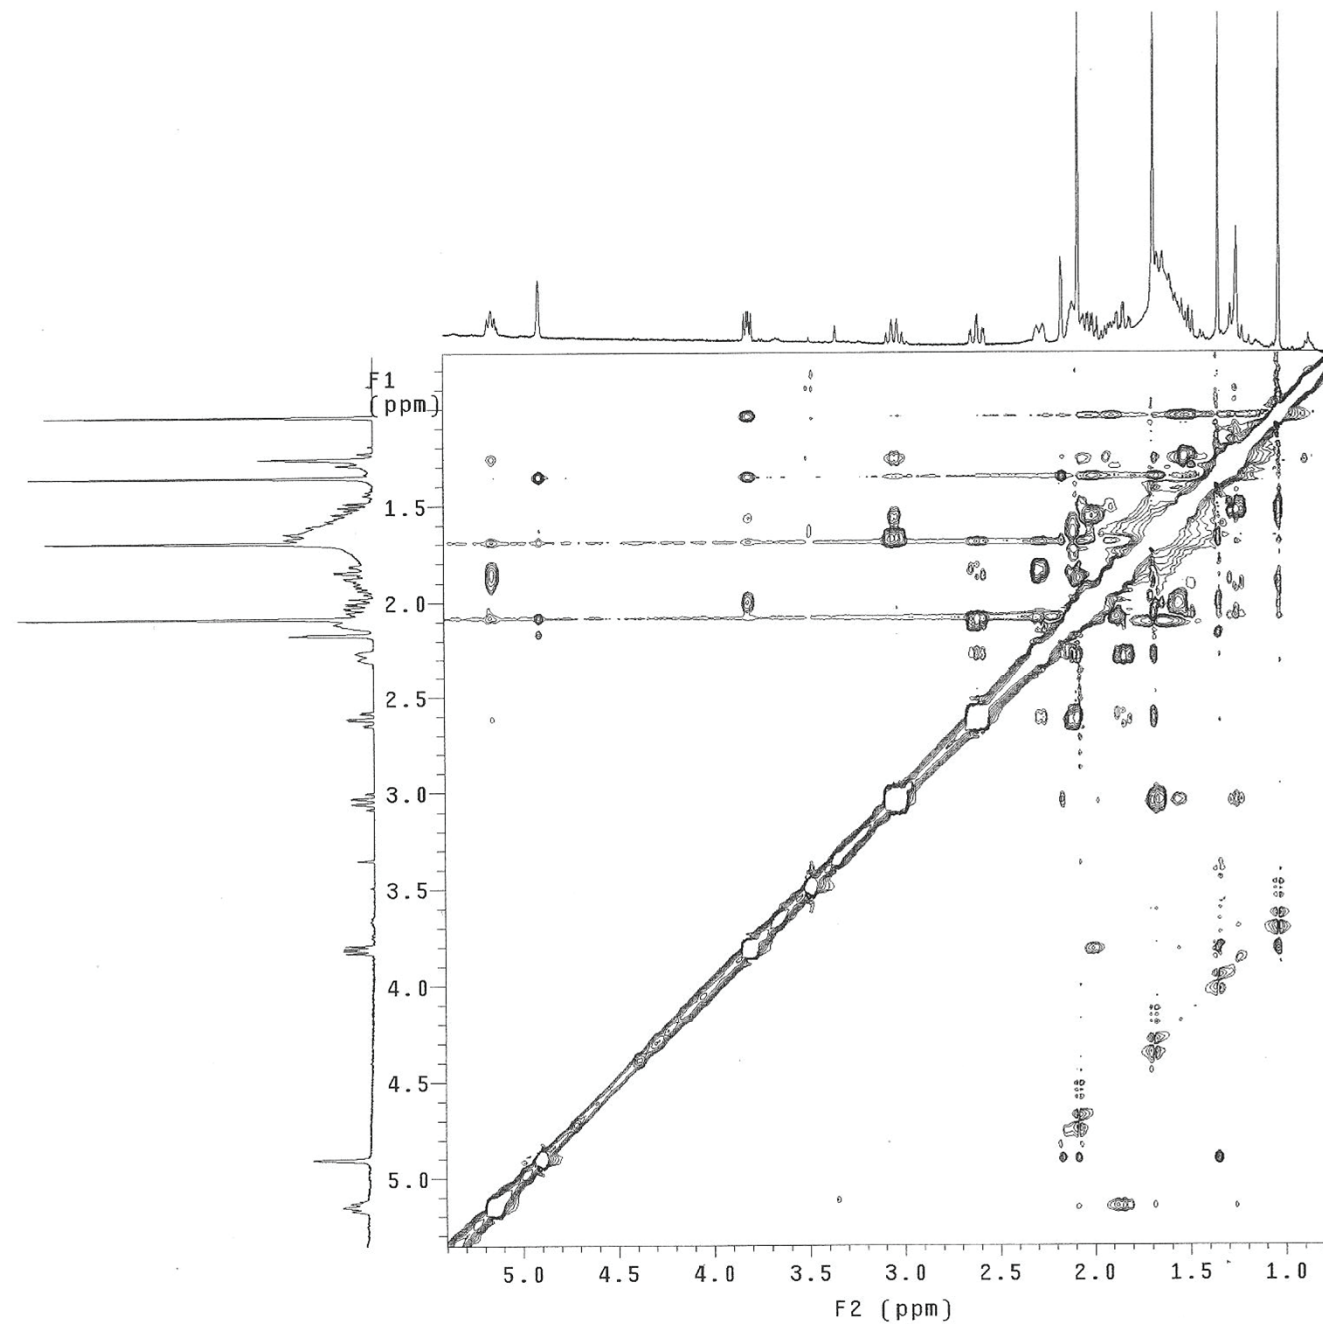

**Figure S1-3.** NOESY spectrum of compound **1** in  $\text{CDCl}_3$ .

F1-19-5-5-4-4

Sample Name:  
F1-19-5-5-4-4  
Data Collected on:  
Varian-NMR-vnmrs400  
Archive directory:  
/home/sheu/vnmrsys/data  
Sample directory:  
F1-19-5-5-4-4\_20150402\_02  
FidFile: PROTON\_01

Pulse Sequence: PROTON (s2pu1)  
Solvent: cdcl3  
Data collected on: Apr 2 2015

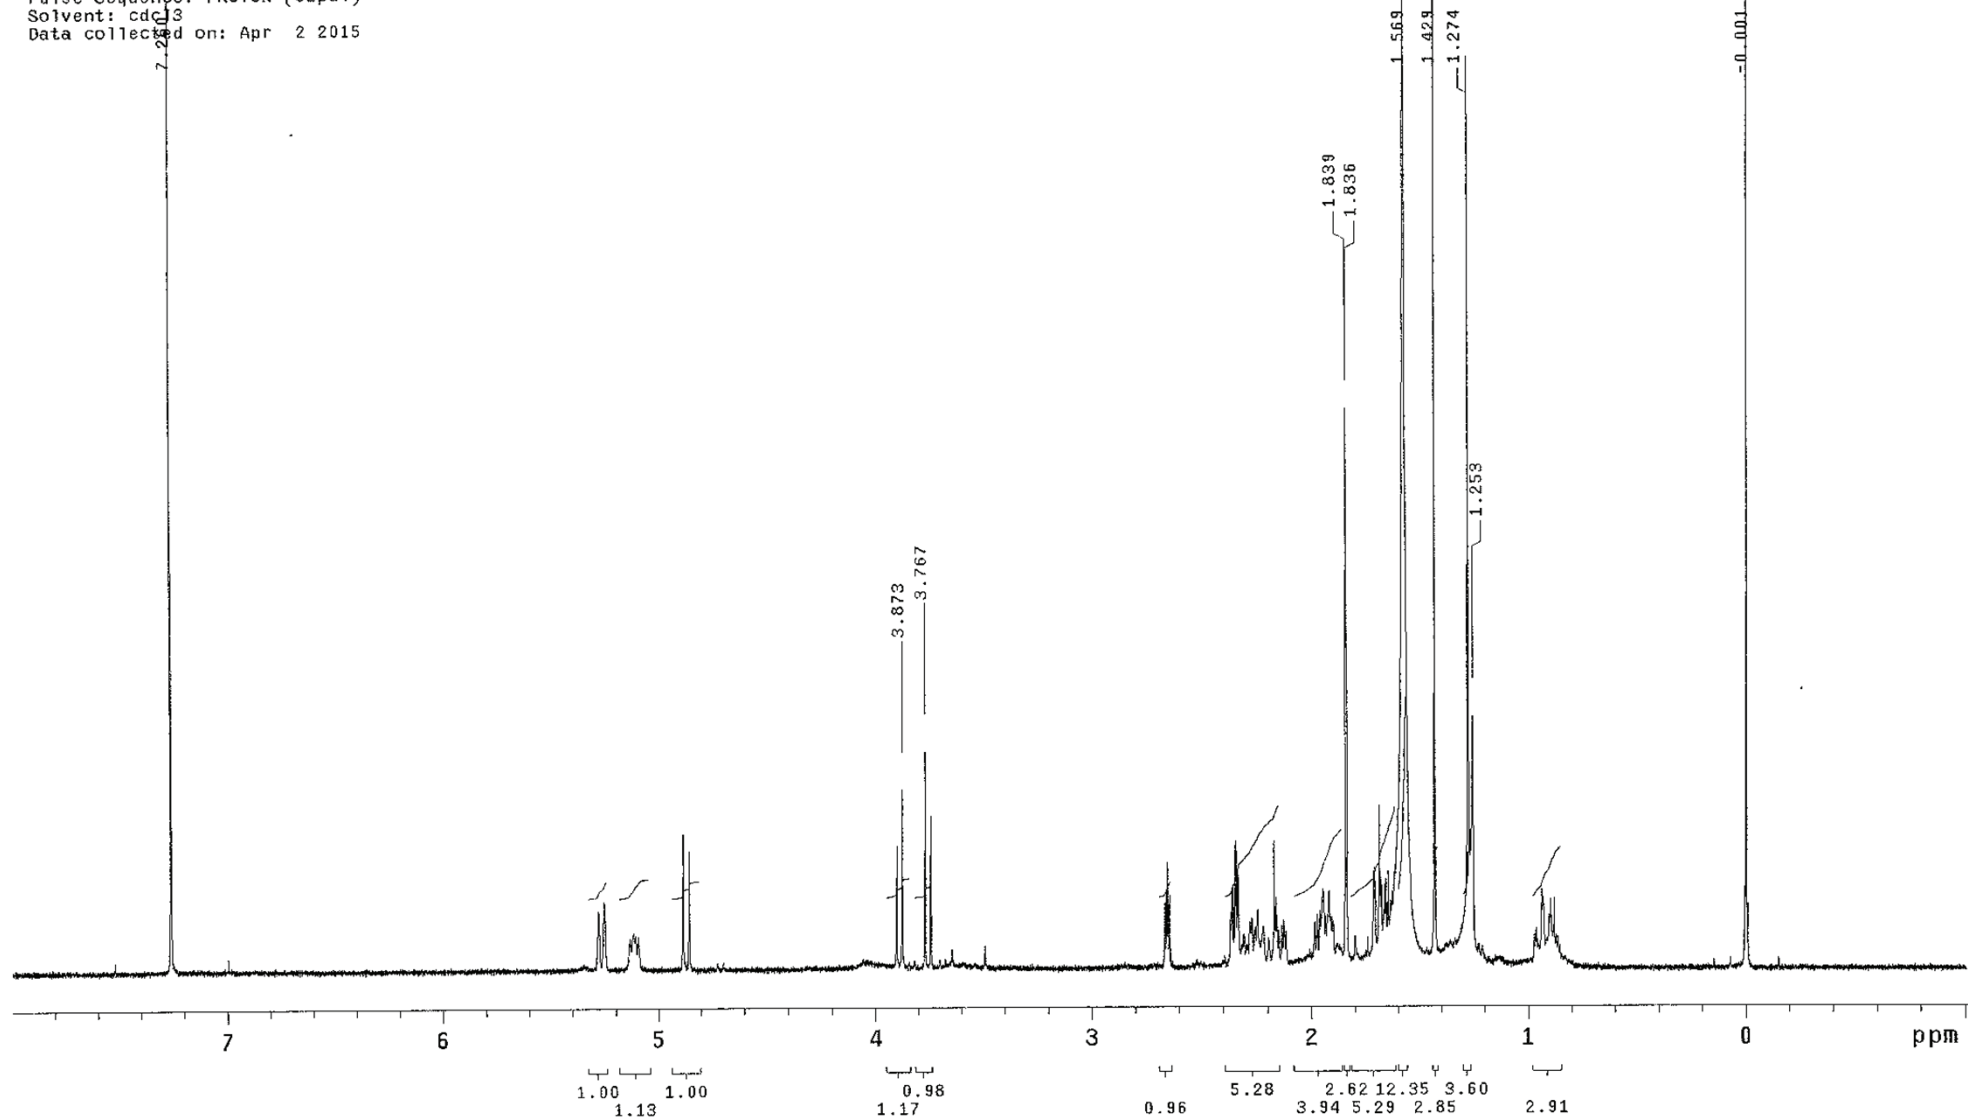

Figure S2-1. <sup>1</sup>H NMR spectrum (400 MHz) of compound 2 in CDCl<sub>3</sub>

F1-19-5-5-4-4

Sample Name:  
F1-19-5-5-4-4  
Data Collected on:  
Varian-NMR-vnmrs400  
Archive directory:  
/home/sheu/vnmrsys/data  
Sample directory:  
F1-19-5-5-4-4\_20150402\_02  
FidFile: CARBON\_01

Pulse Sequence: CARBON (s2pu1)  
Solvent: cdc13  
Data collected on: Apr 2 2015

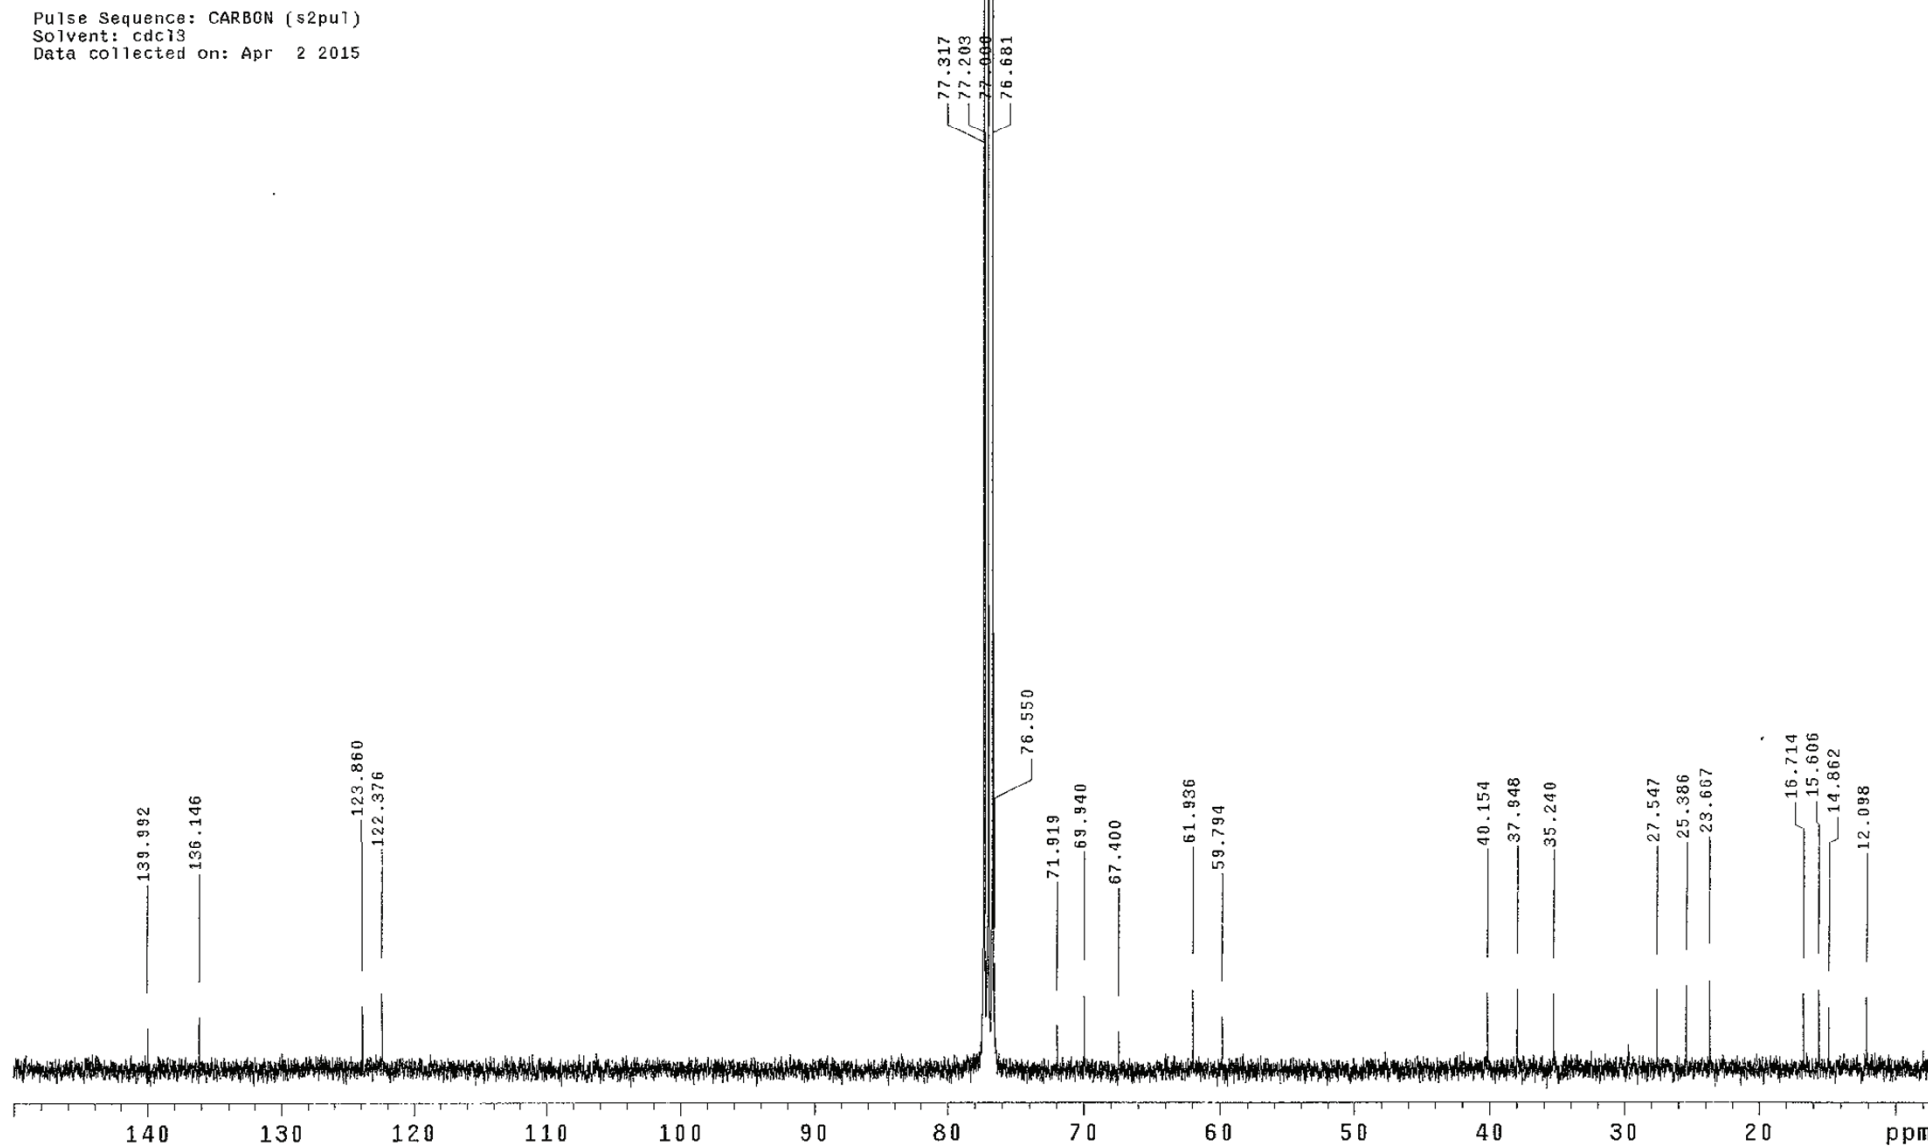

Figure S2-2. <sup>13</sup>C NMR spectrum (100 MHz) of compound **2** in CDCl<sub>3</sub>.

F1-32-4-1-1(AAA)-6-4-1

Sample Name:  
F1-32-4-1-1\_AAA\_-6-4-1  
Data Collected on:  
Varian-NMR-vnmrs400  
Archive directory:  
/home/sheu/vnmrsys/data  
Sample directory:  
F1-32-4-1-1\_AAA\_-6-4-1\_20150313\_01  
Fidfile: PROTON\_01

Pulse Sequence: PROTON (s2pu1)  
Solvent: cdcl3  
Data collected on: Mar 13 2015

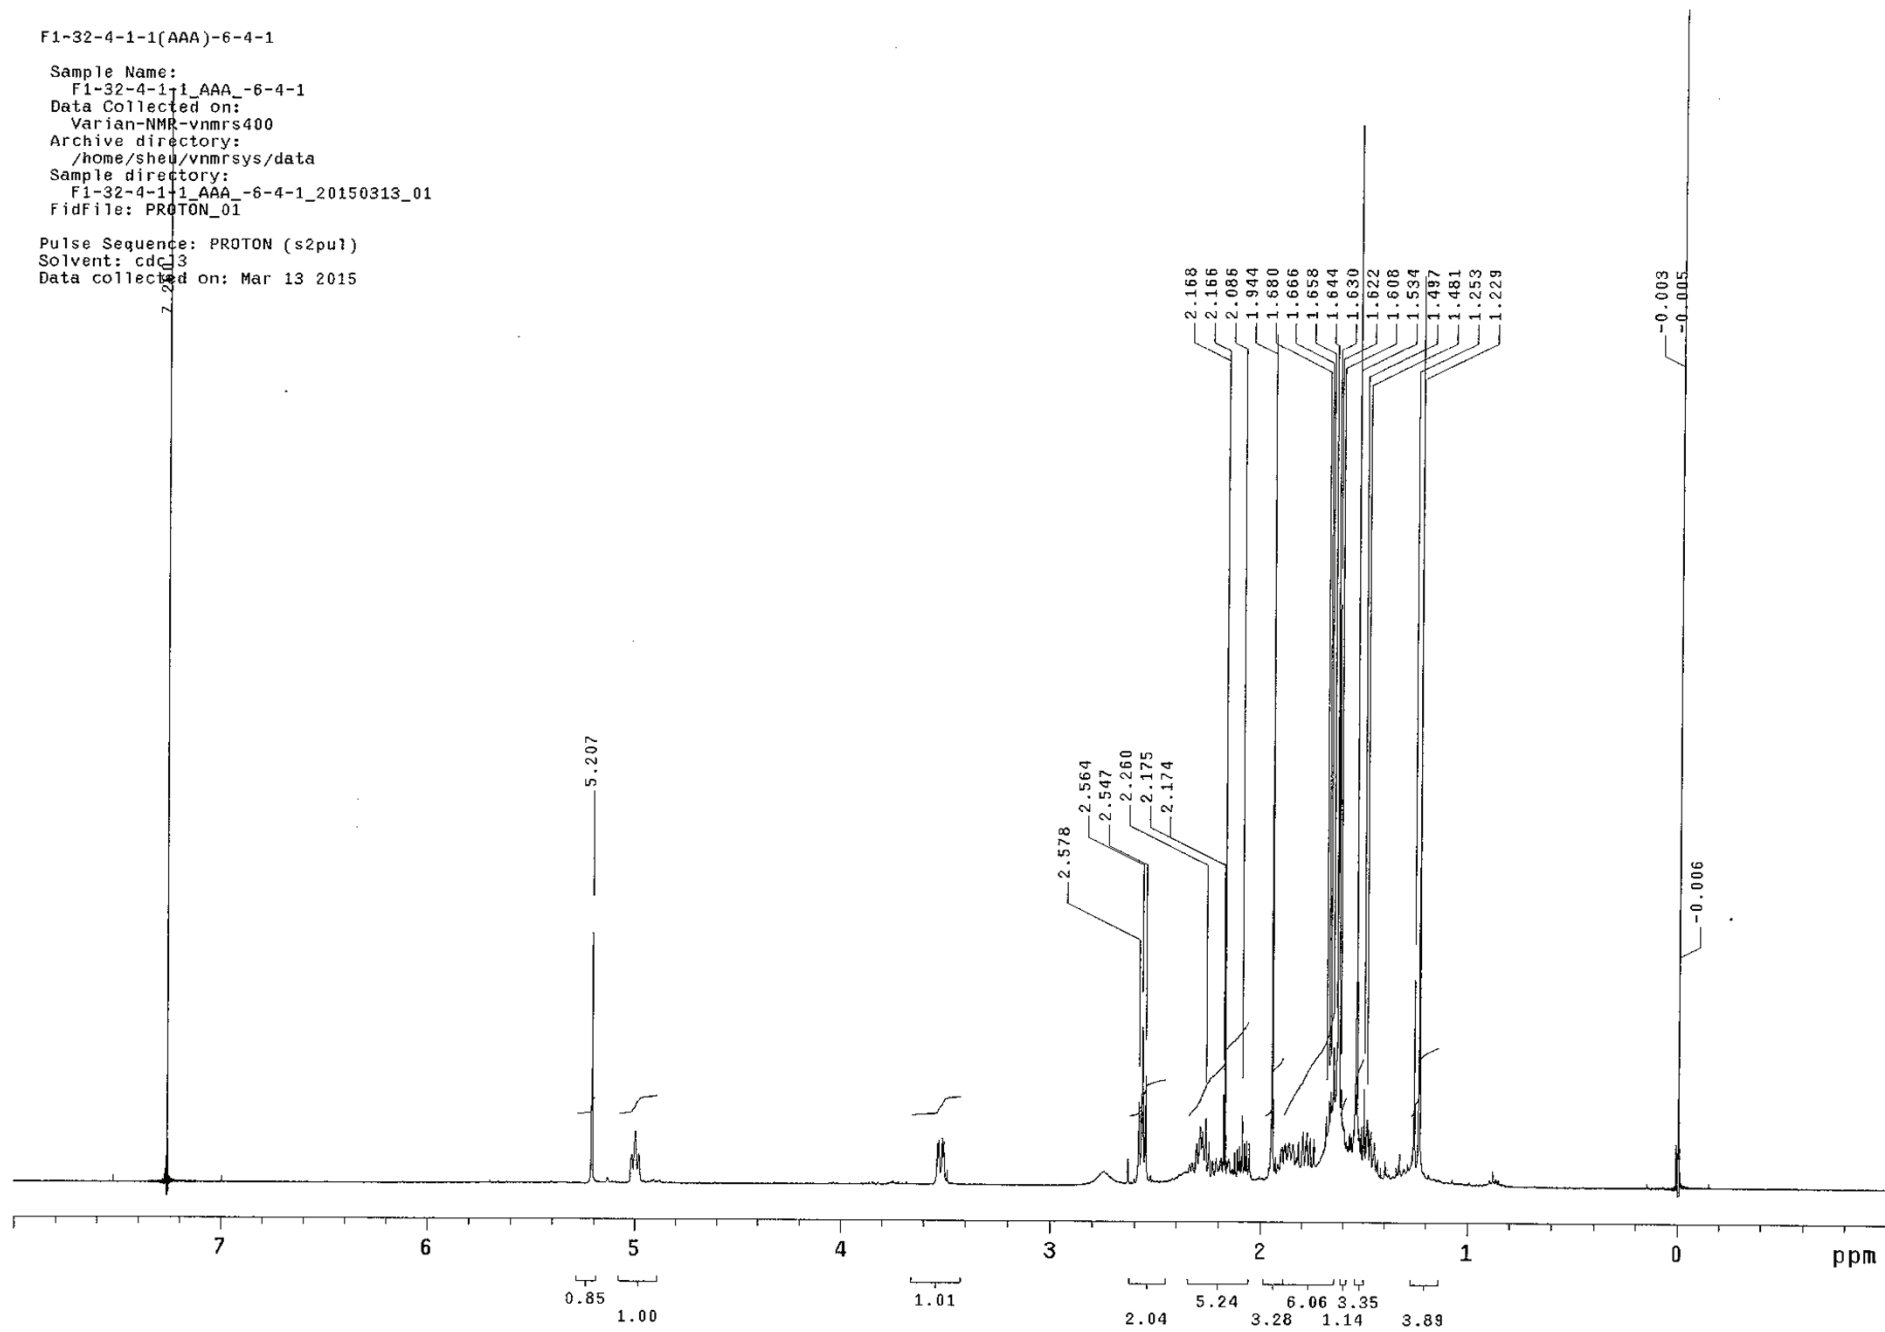

Figure S3-1. <sup>1</sup>H NMR spectrum (400 MHz) of compound 3 in CDCl<sub>3</sub>.



F1-32-4-1-1(AAA)-6-4-1

Sample Name:  
F1-32-4-1-1\_AAA\_-6-4-1  
Data Collected on:  
Varian-NMR-vnmrs400  
Archive directory:  
/home/sheu/vnmrsys/data  
Sample directory:  
F1-32-4-1-1\_AAA\_-6-4-1\_20150317\_01  
FidFile: CARBON\_01

Pulse Sequence: CARBON (s2pu1)  
Solvent: cdc13  
Data collected on: Mar 17 2015

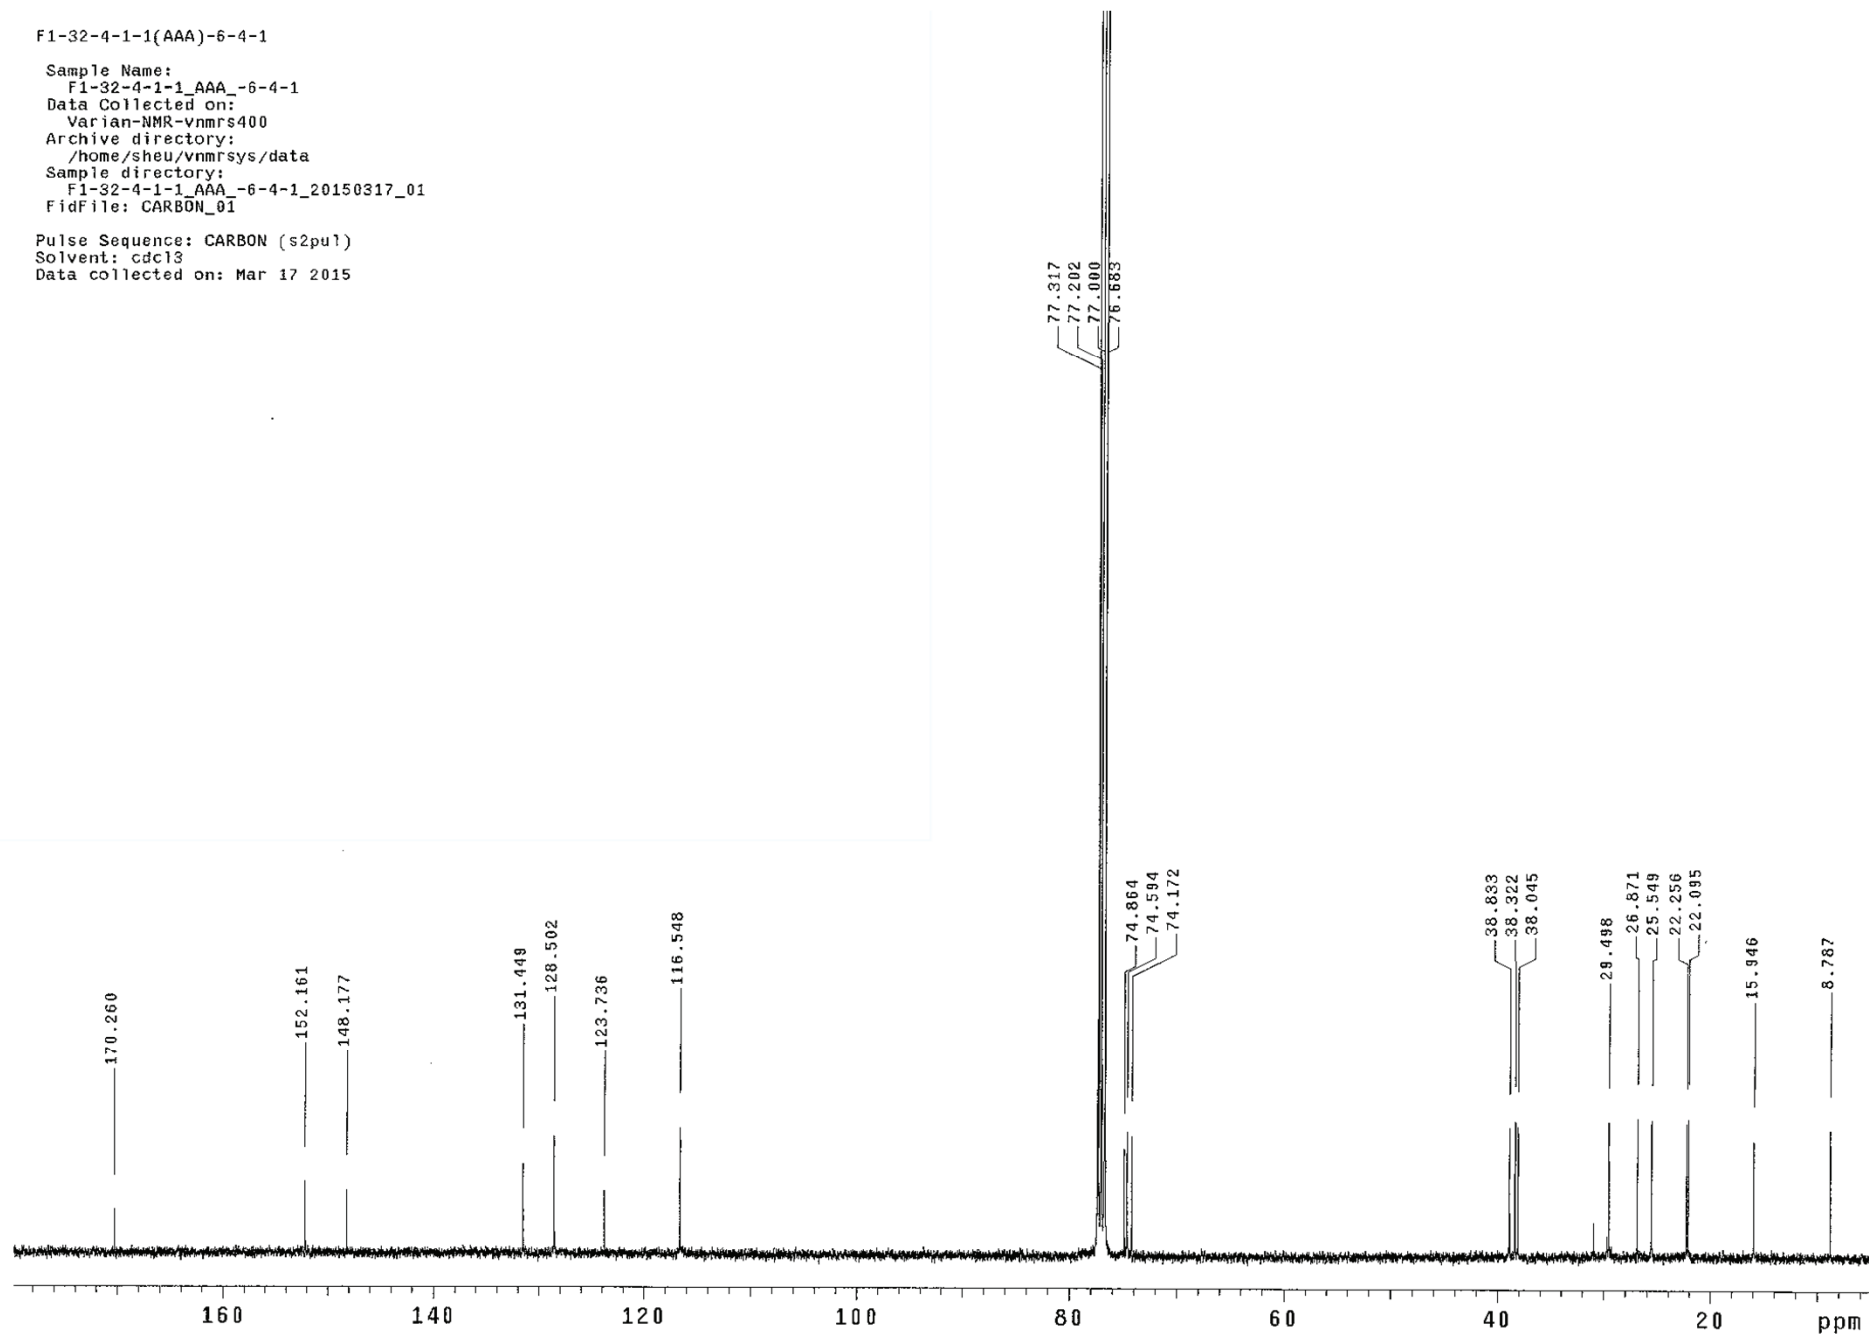

Figure S3-2.  $^{13}\text{C}$  NMR spectrum (100 MHz) of compound **3** in  $\text{CDCl}_3$

F1-35-2-1

Sample Name:  
F1-35-2-1  
Data Collected on:  
Varian-NMR-vnmrs400  
Archive directory:  
/home/sheu/vnmrsys/data  
Sample directory:  
F1-35-2-1\_20150610\_01  
FidFile: PROTON\_01

Pulse Sequence: PROTON (s2pu1)  
Solvent: dms0  
Data collected on: Jun 10 2015

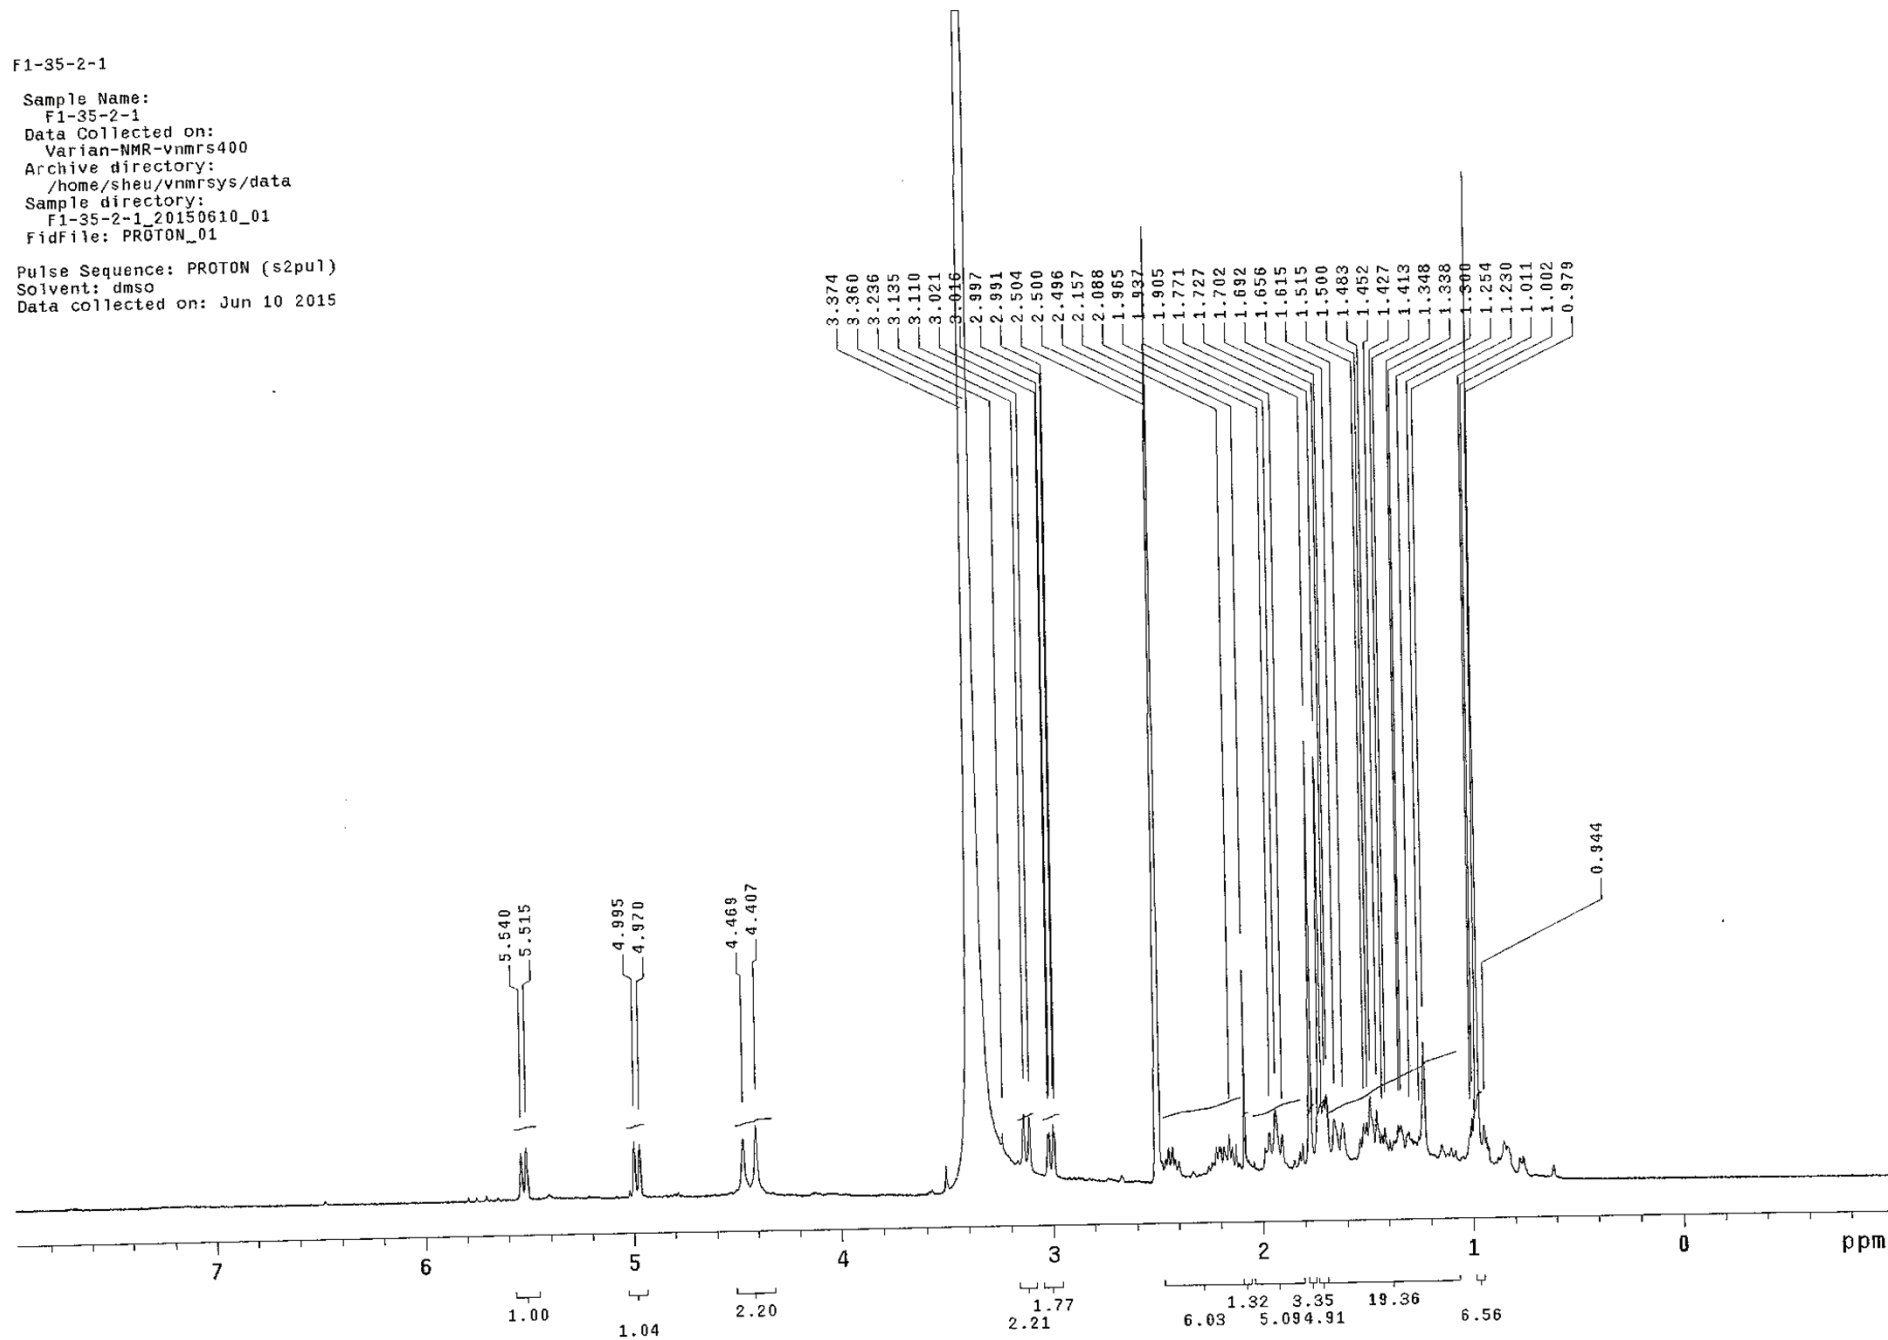

Figure S4-1. <sup>1</sup>H NMR spectrum (400 MHz) of compound 4 in DMSO.

F1-35-2-1

Sample Name:  
F1-35-2-1  
Data Collected on:  
Varian-NMR-vnmrs400  
Archive directory:  
/home/sheu/vnmrsys/data  
Sample directory:  
F1-35-2-1\_20150502\_01  
FidFile: CARBON\_01

Pulse Sequence: CARBON (s2pul)  
Solvent: dmsd  
Data collected on: May 2 2015

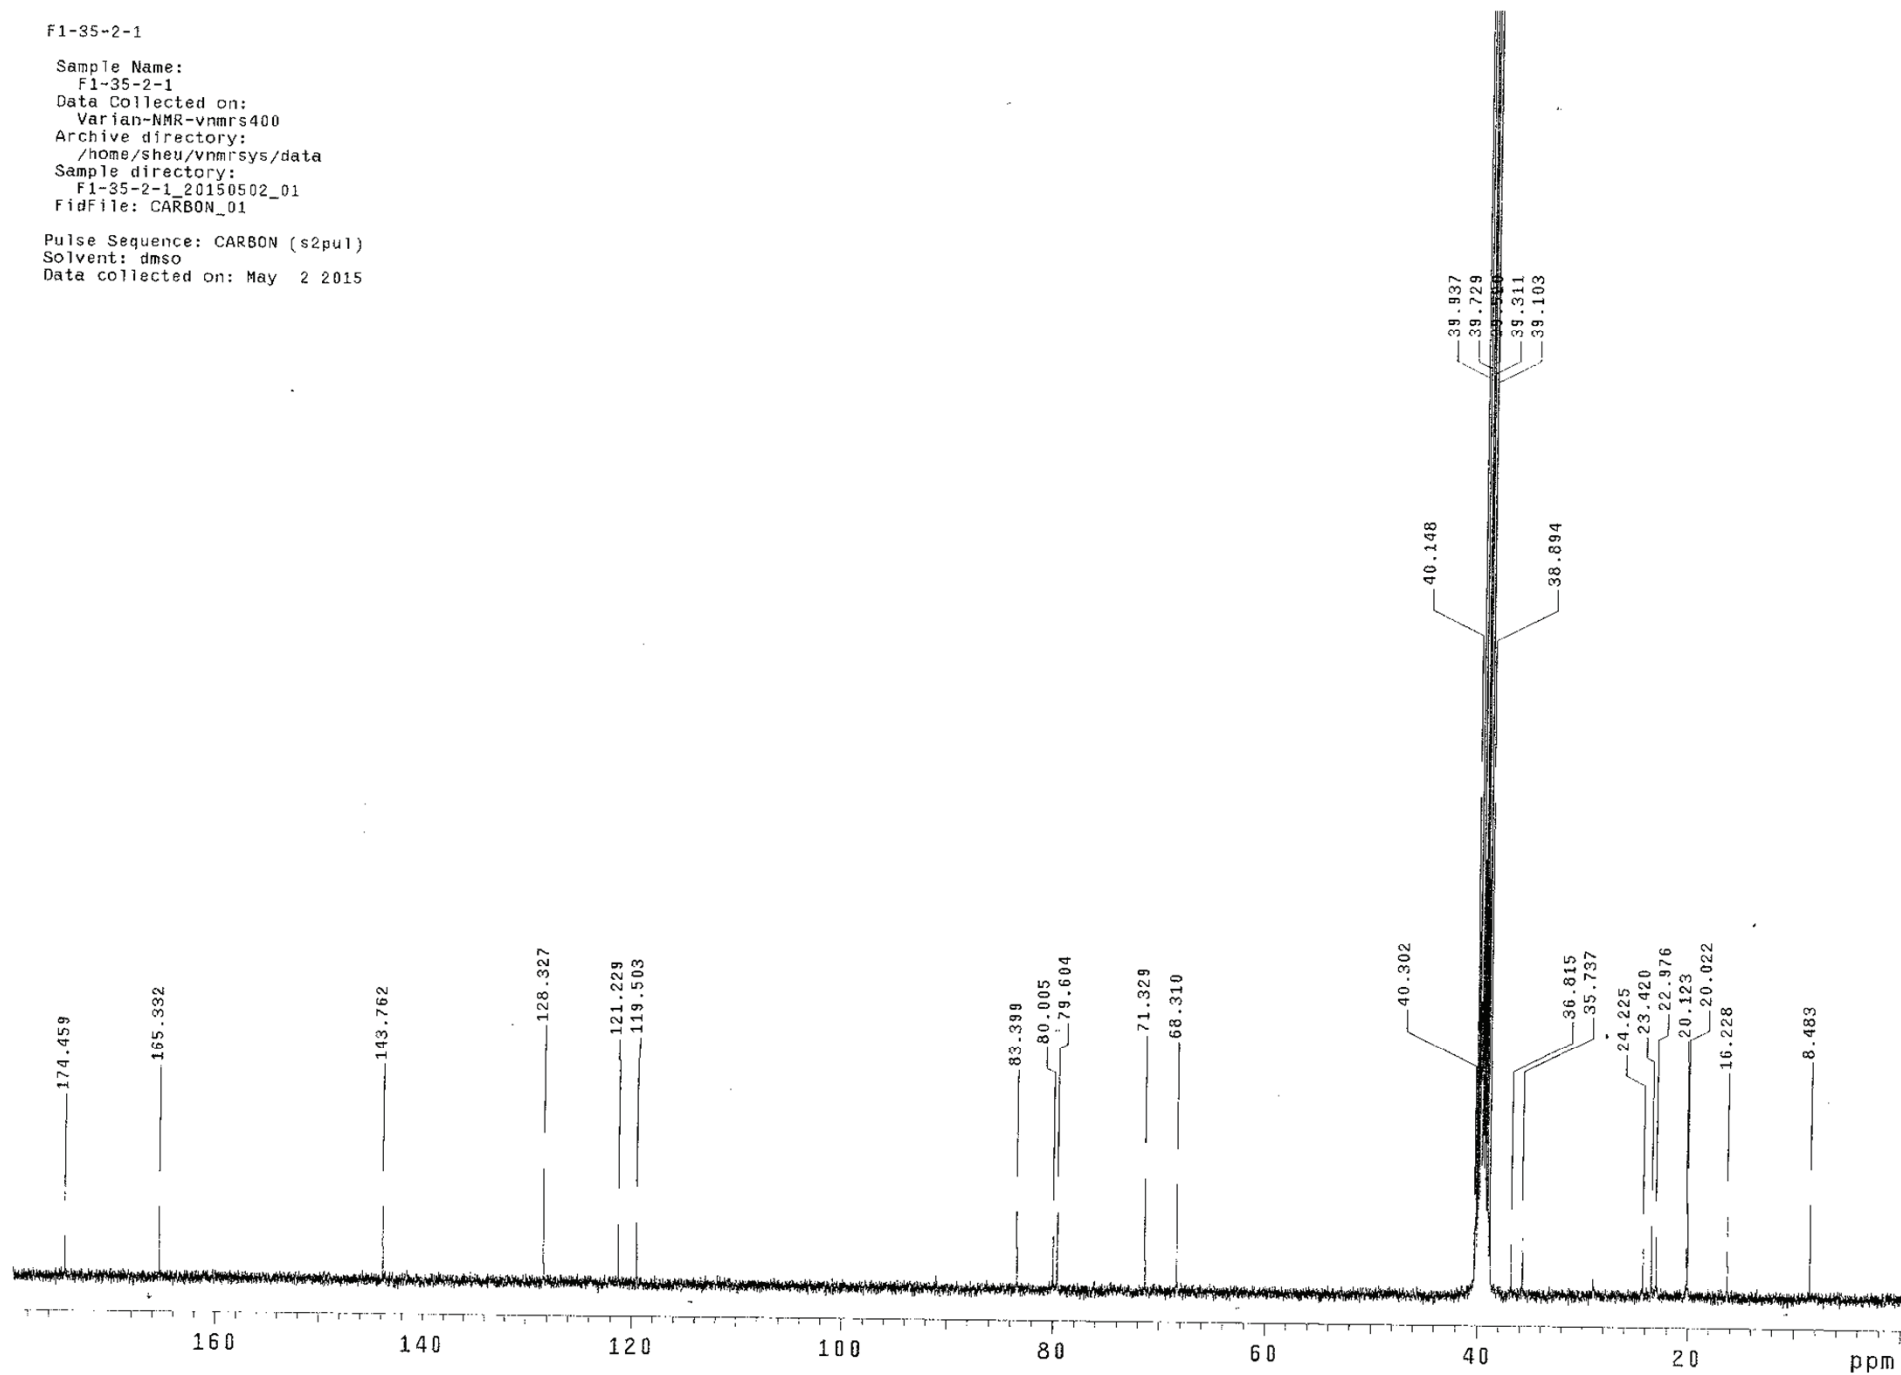

Figure S4-2.  $^{13}\text{C}$  NMR spectrum (100 MHz) of compound 4 in DMSO.

F1-37-3-1

Sample Name:  
F1-37-3-1  
Data Collected on:  
Varian-NMR-vnmrs400  
Archive directory:  
/home/sheu/vnmrsys/data  
Sample directory:  
F1-37-3-1\_20150325\_01  
FidFile: PROTON\_01

Pulse Sequence: PROTON (s2pu1)  
Solvent: cd3od  
Data collected on: Mar 25 2015

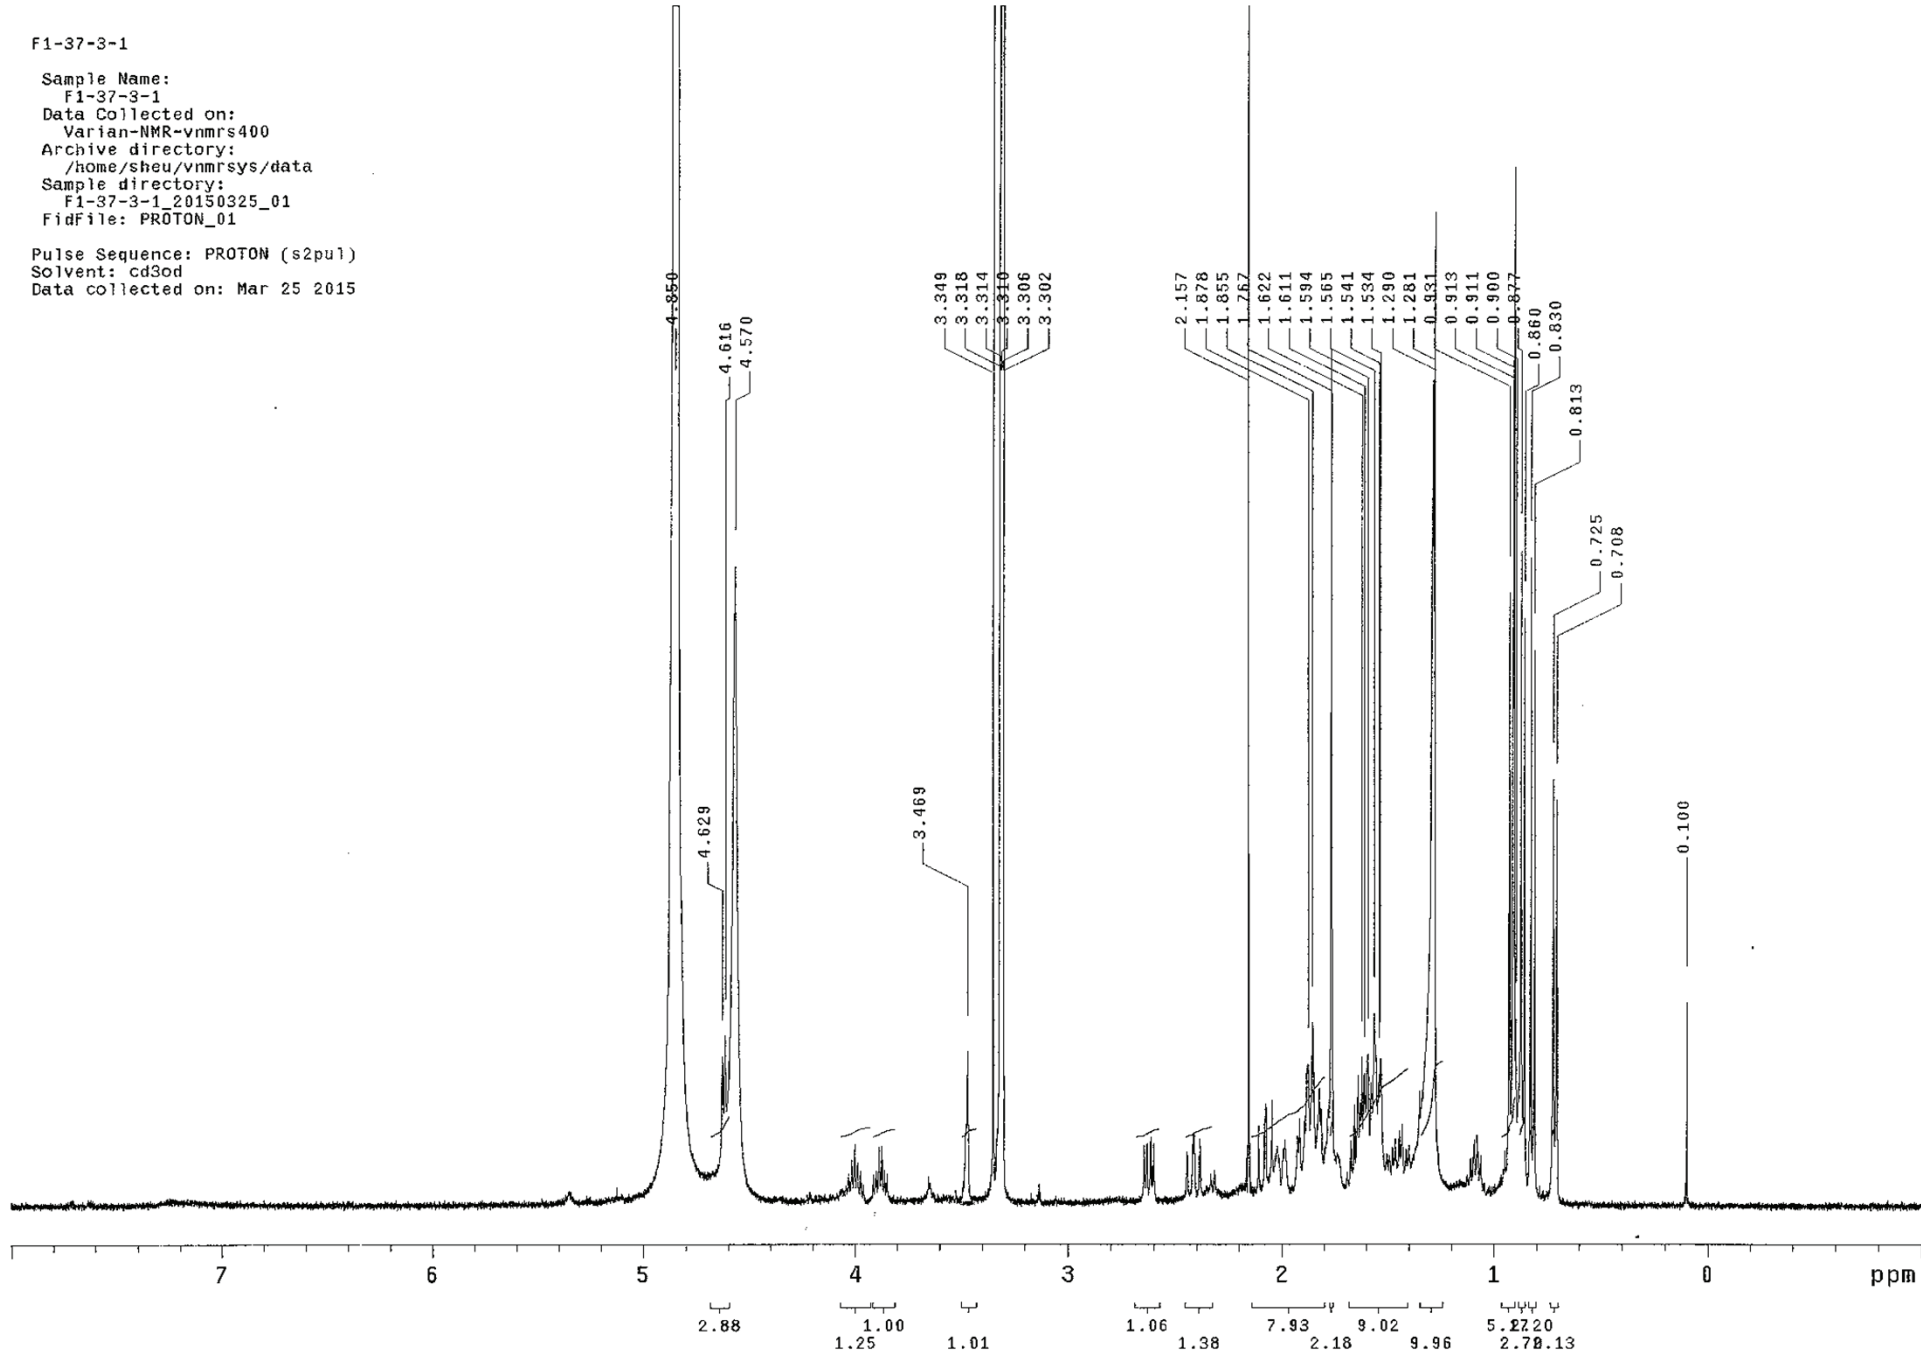

Figure S5-1.  $^1\text{H}$  NMR spectrum (400 MHz) of compound **5** in  $\text{CD}_3\text{OD}$ .

F1-37-3-1

Sample Name:  
F1-37-3-1  
Data Collected on:  
Varian-NMR-vnmrs400  
Archive directory:  
/home/sheu/vnmrsys/data  
Sample directory:  
F1-37-3-1\_20150316\_01  
FidFile: CARBON\_01

Pulse Sequence: CARBON (s2pu1)  
Solvent: cd3od  
Data collected on: Mar 17 2015

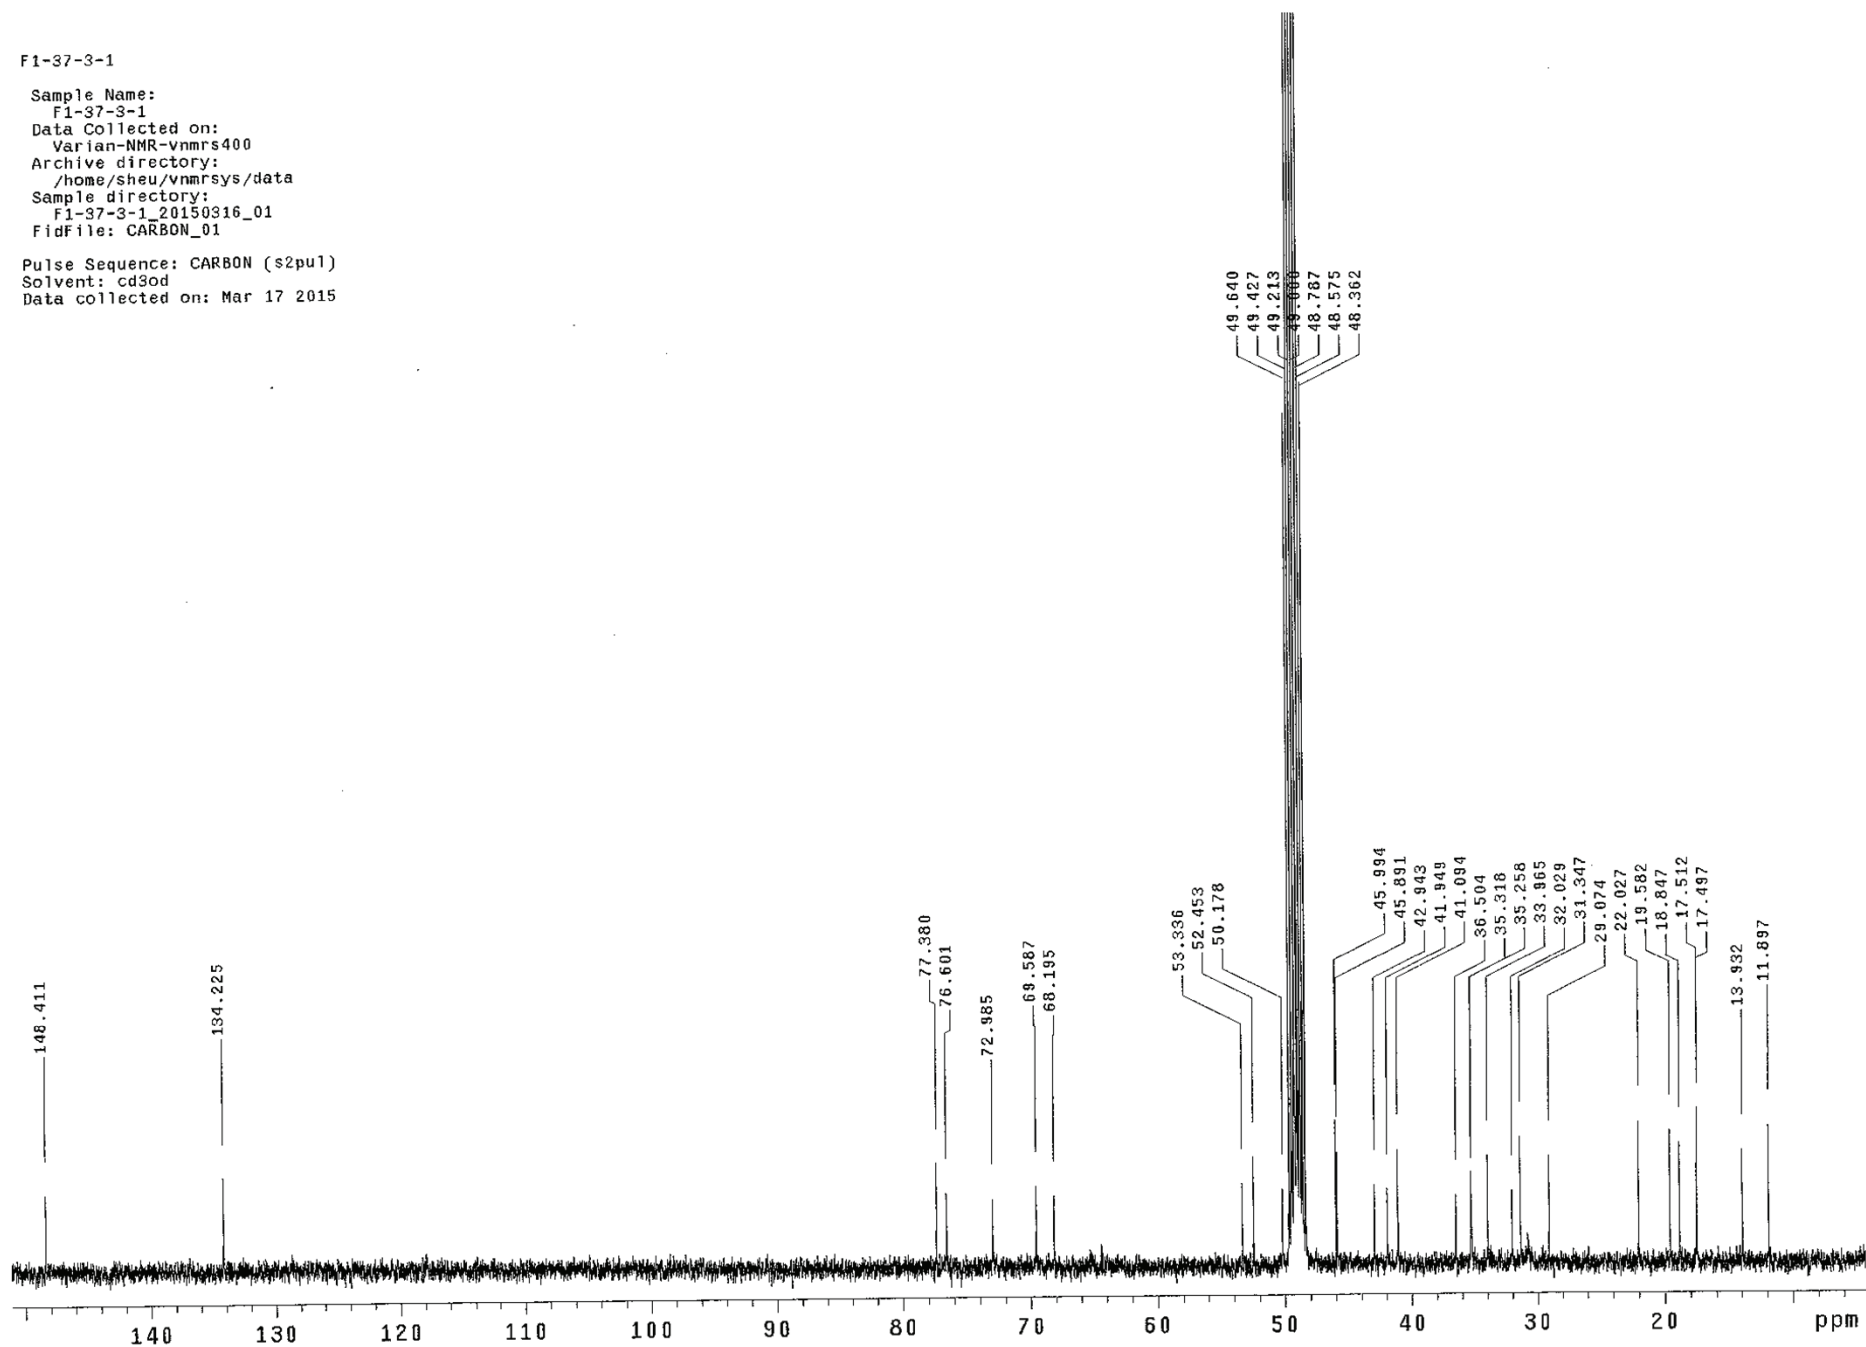

Figure S5-2. <sup>13</sup>C NMR spectrum (100 MHz) of compound **5** in CD<sub>3</sub>OD.

F1-35-2-4

Sample Name:  
F1-35-2-4  
Data Collected on:  
Varian-NMR-vnmrs400  
Archive directory:  
/home/sheu/vnmrsys/data  
Sample directory:  
F1-35-2-4\_20150111\_01  
FidFile: PROTON\_01

Pulse Sequence: PROTON (s2pu1)  
Solvent: cdc13  
Data collected on: Jan 11 2015

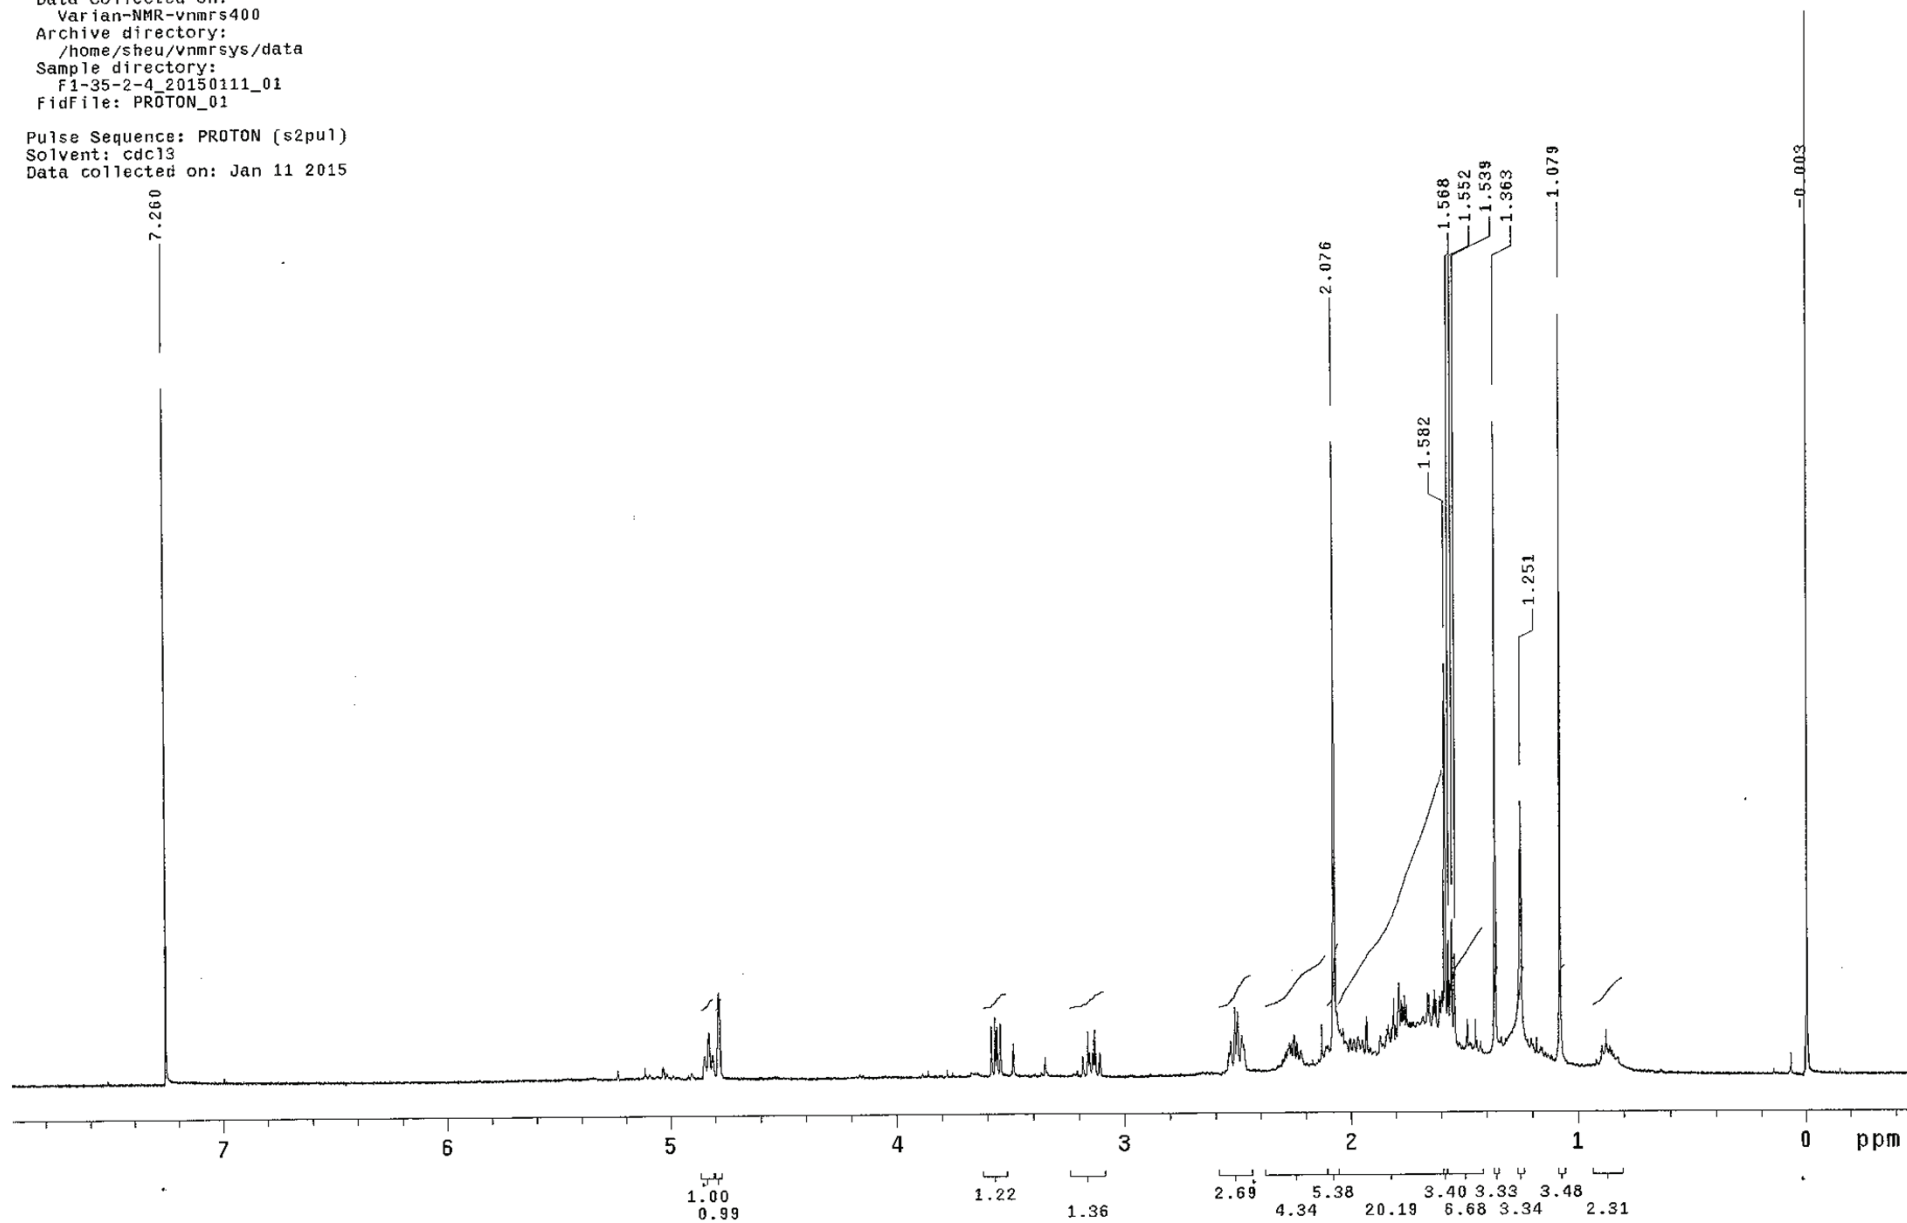

Figure S6-1.  $^1\text{H}$  NMR spectrum (400 MHz) of compound **7** in  $\text{CDCl}_3$ .

F1-35-2-4

Sample Name:  
F1-35-2-4  
Data Collected on:  
Varian-NMR-vnmrs400  
Archive directory:  
/home/sheu/vnmrsys/data  
Sample directory:  
F1-35-2-4\_20141215\_01  
FidFile: CARBON\_01

Pulse Sequence: CARBON (s2pu1)  
Solvent: cdcl3  
Data collected on: Dec 15 2014

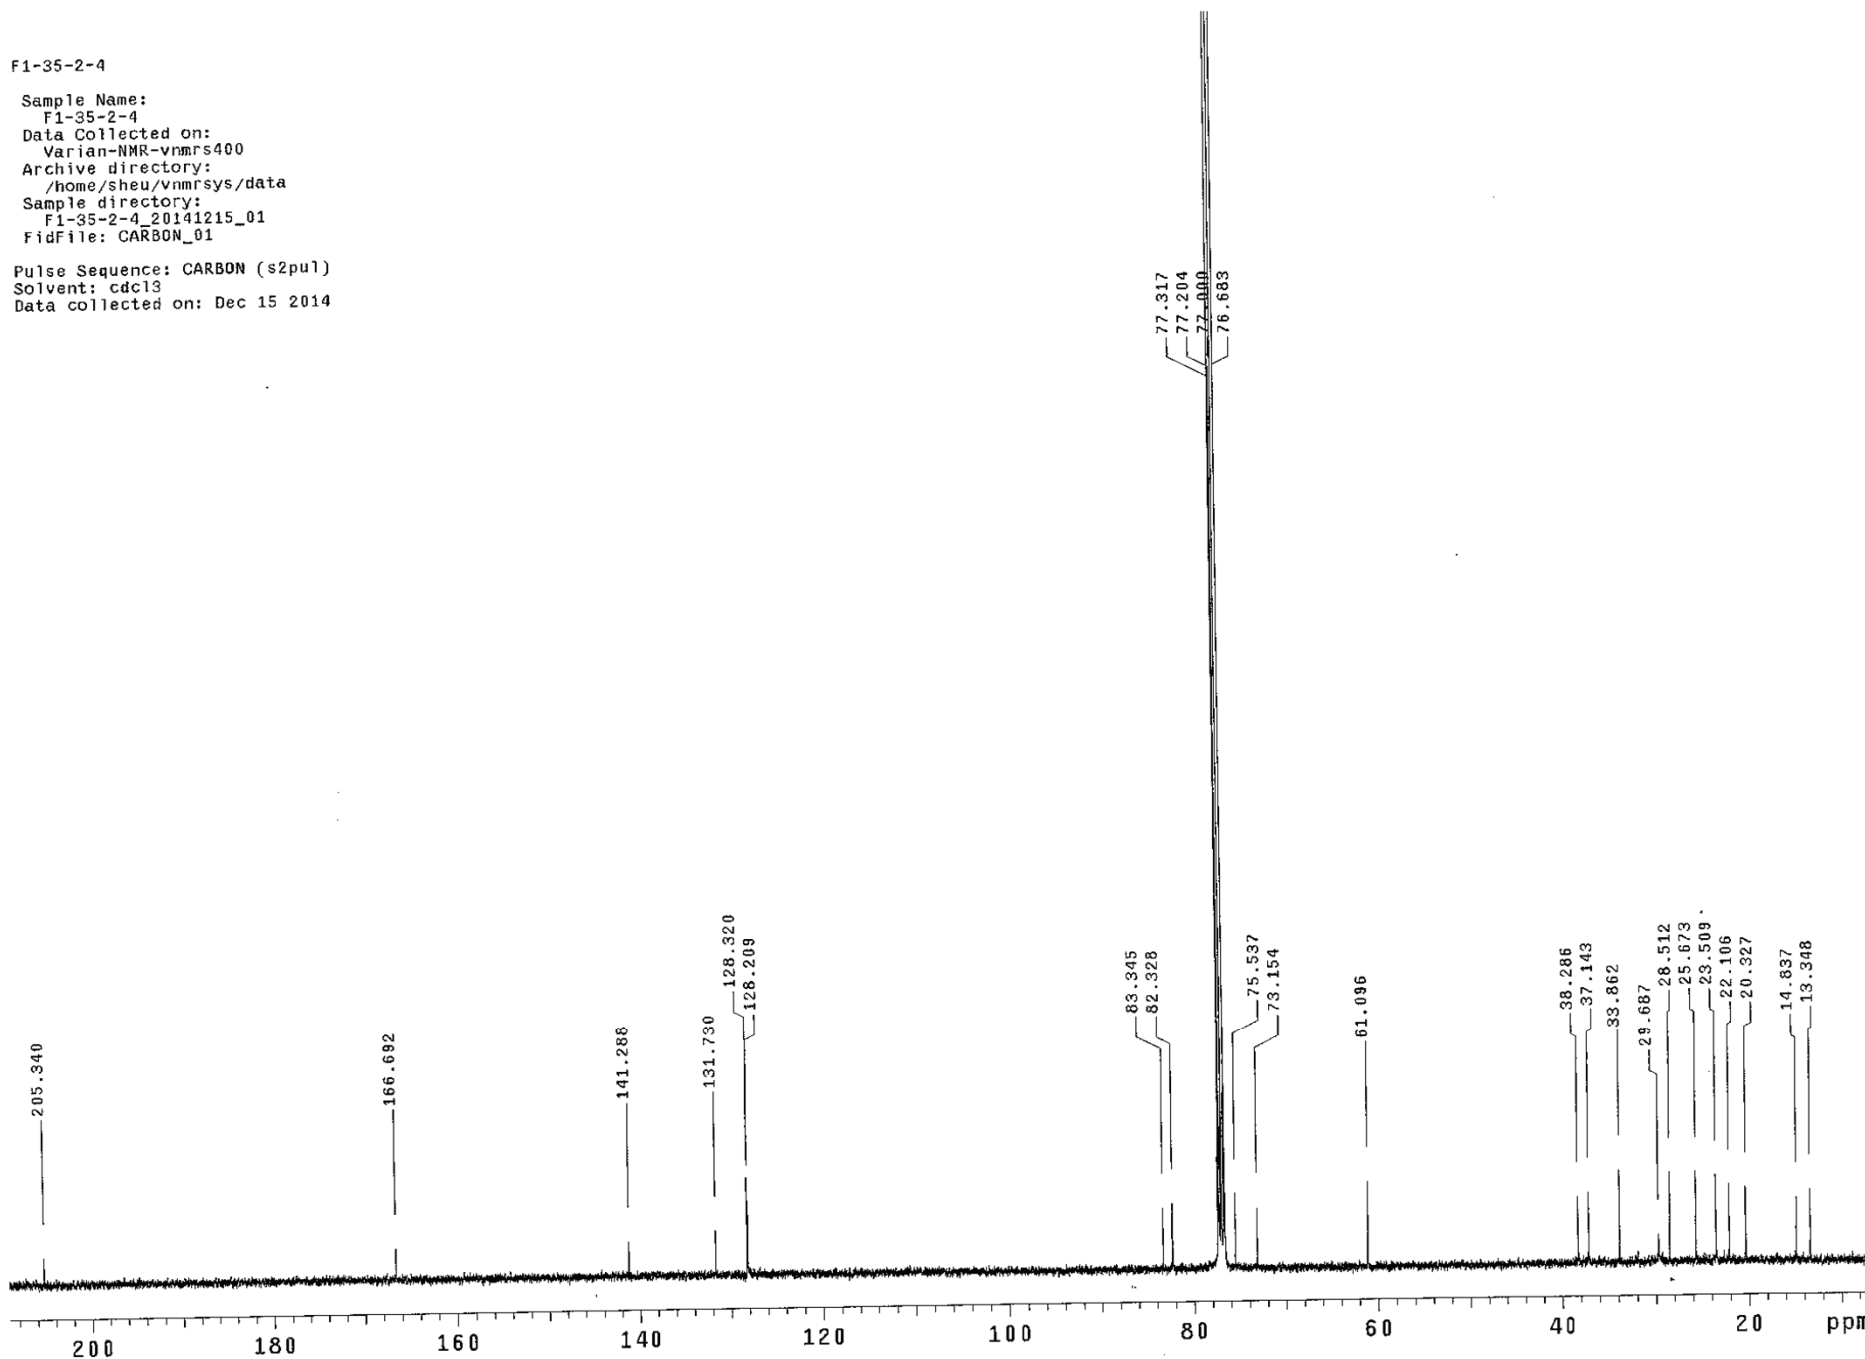

Figure S6-2. <sup>13</sup>C NMR spectrum (100 MHz) of compound 7 in CDCl<sub>3</sub>.

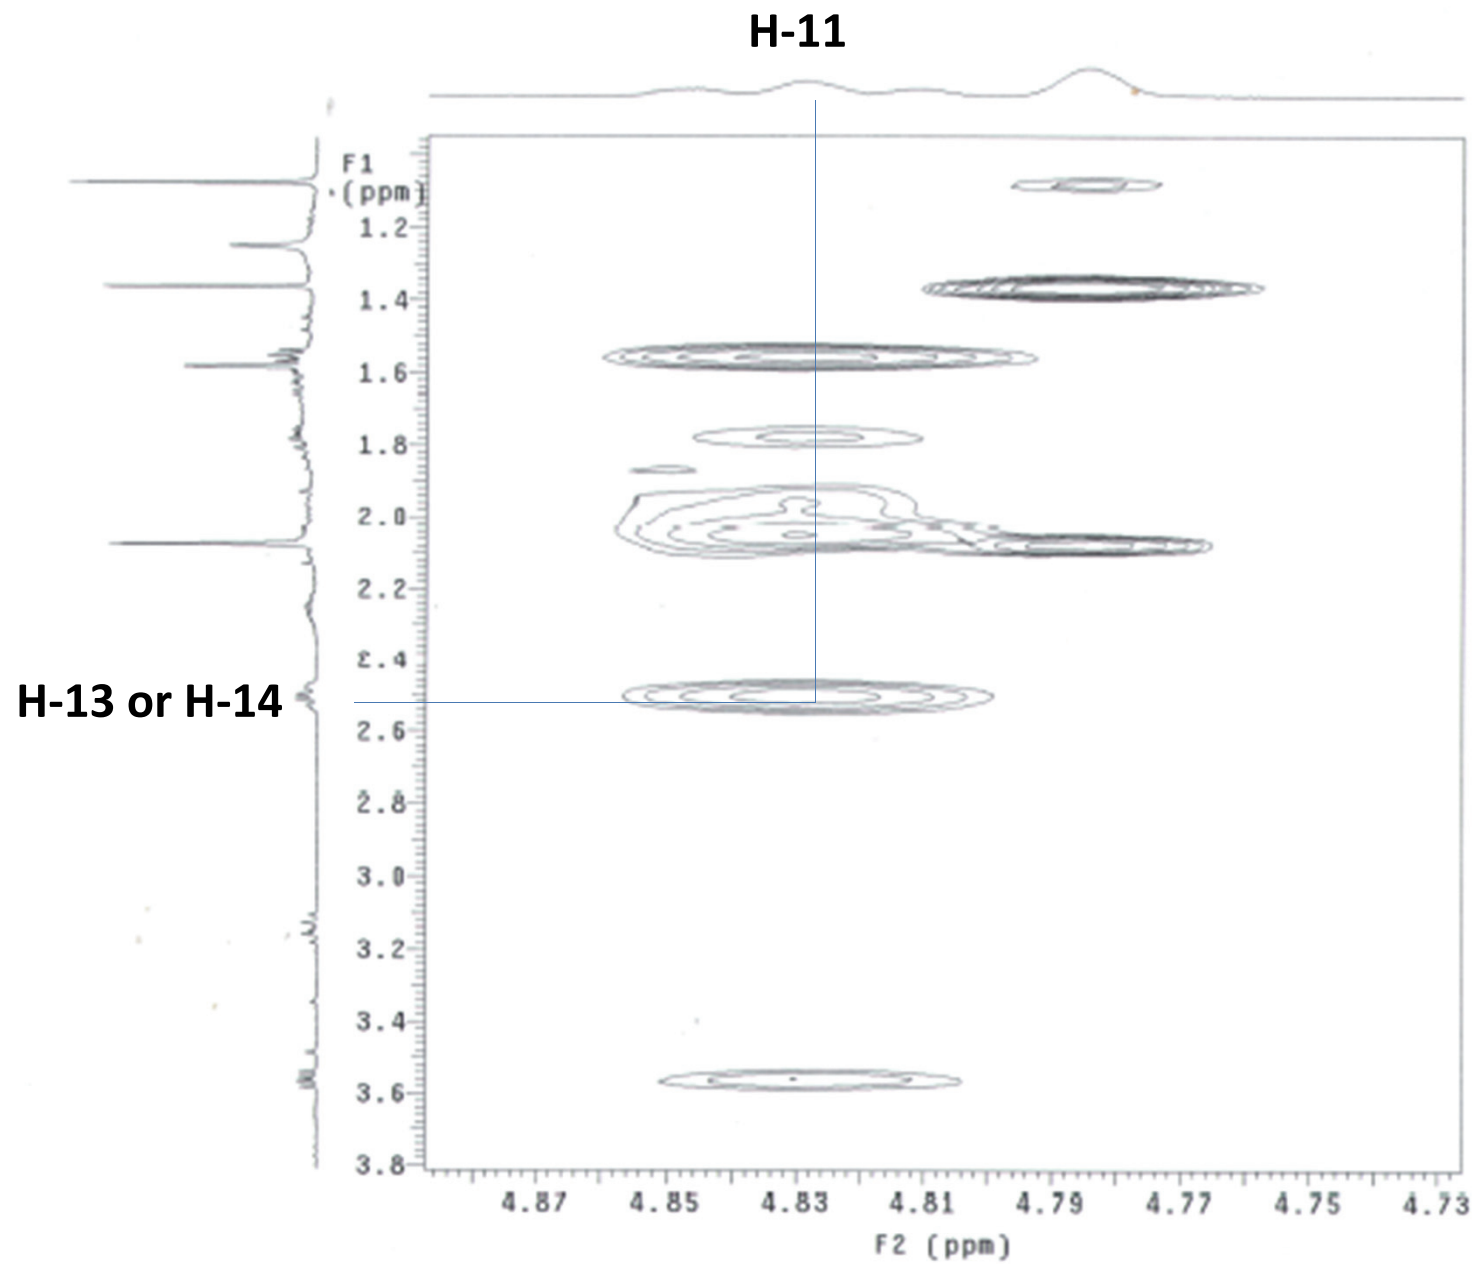

**Figure S6-3.** Partial NOESY spectrum of compound **7** in CDCl<sub>3</sub>.
